# Supplementary material for: Inhibition of Glycogen Synthase II with RNAi Prevents Liver Injury in Mouse Models of Glycogen Storage Diseases
Source: PubMed Central journal article supplement — Mol Ther. 2018 Apr 27;26(7):1771–82. doi: 10.1016/j.ymthe.2018.04.023 (PMC6035741; doi:10.1016/j.ymthe.2018.04.023), 2018-04-27
Supplement: mmc2.pdf [file mmc2.pdf]

# Inhibition of Glycogen Synthase II with RNAi Prevents Liver Injury in Mouse Models of Glycogen Storage Diseases

Natalie Pursell,<sup>1</sup> Jessica Gierut,<sup>1</sup> Wei Zhou,<sup>1</sup> Michael Dills,<sup>1</sup> Rohan Diwanji,<sup>1</sup> Monika Gjorgjieva,<sup>2</sup> Utsav Saxena,<sup>1</sup> Jr-Shiuan Yang,<sup>1</sup> Anee Shah,<sup>1</sup> Nandini Venkat,<sup>1</sup> Rachel Storr,<sup>1</sup> Boyoung Kim,<sup>1</sup> Weimin Wang,<sup>1</sup> Marc Abrams,<sup>1</sup> Margaux Raffin,<sup>2</sup> Gilles Mithieux,<sup>2</sup> Fabienne Rajas,<sup>2</sup> Henryk Dudek,<sup>1</sup> Bob D. Brown,<sup>1</sup> and Chengjung Lai<sup>1</sup>

<sup>1</sup>Dicerna Pharmaceuticals, Cambridge, MA 02140, USA; <sup>2</sup>INSERM U1213, Université Lyon 1, Lyon, France

**Glycogen storage diseases (GSDs) of the liver are devastating disorders presenting with fasting hypoglycemia as well as hepatic glycogen and lipid accumulation, which could lead to long-term liver damage. Diet control is frequently utilized to manage the potentially dangerous hypoglycemia, but there is currently no effective pharmacological treatment for preventing hepatomegaly and concurrent liver metabolic abnormalities, which could lead to fibrosis, cirrhosis, and hepatocellular adenoma or carcinoma. In this study, we demonstrate that inhibition of glycogen synthesis using an RNAi approach to silence hepatic *Gys2* expression effectively prevents glycogen synthesis, glycogen accumulation, hepatomegaly, fibrosis, and nodule development in a mouse model of GSD III. Mechanistically, reduction of accumulated abnormally structured glycogen prevents proliferation of hepatocytes and activation of myofibroblasts as well as infiltration of mononuclear cells. Additionally, we show that silencing *Gys2* expression reduces hepatic steatosis in a mouse model of GSD type Ia, where we hypothesize that the reduction of glycogen also reduces the production of excess glucose-6-phosphate and its subsequent diversion to lipid synthesis. Our results support therapeutic silencing of *GYS2* expression to prevent glycogen and lipid accumulation, which mediate initial signals that subsequently trigger cascades of long-term liver injury in GSDs.**

## INTRODUCTION

The hepatic glycogen storage diseases (GSDs) are inherited disorders of glycogen metabolism that present clinically with hepatomegaly, liver injury, failure to thrive, and/or fasting hypoglycemia.<sup>1</sup> These GSDs, including types 0, I, III, IV, VI, and IX, are caused by deficiencies in enzymes or transporters involved in glycogen synthesis or breakdown.<sup>1</sup> In a healthy individual, excess postprandial glucose is converted via a multi-enzyme process into uridine diphosphate (UDP)-glucose, from which an initial glycogen polymer is formed on the glycogenin 2 (GYG2) dimer scaffold via  $\alpha$ -1,4 glycosidic linkages using its autoglycosylation activity (Figure S1).<sup>2,3</sup> Glycogen synthase 2 (GYS2) continues to catalyze the addition of UDP-glucose onto existing glucose molecules to increase the length of linear

glucose polymer chain. Subsequently, glycogen branching enzyme (GBE) is able to attach a new branch point with  $\alpha$ -1,6 glycosidic linkage that serves as a new initial point for another cycle of linear glucose chain elongation. Working together, GYS2 and GBE build a complicated tree-like structured glycogen molecule with a GYG2 dimer in the center. During periods of fasting, glycogen phosphorylase (GLGP) starts to release glucose-1-phosphate from glycogen until a branching point is encountered. Glycogen debranching enzyme (GDE) activity then is required for transferring and liberating glucose molecules near the branching point before GLGP is able to further process glycogen and release glucose. Glucose-1-phosphate released from glycogen is then converted into glucose-6-phosphate (G6P) and subsequently to glucose by glucose 6-phosphatase (G6Pase) in the final step of glycogenolysis to maintain glucose homeostasis in times of fasting.<sup>4</sup>

GSD type Ia (GSD Ia) is caused by a deficiency of G6Pase and is characterized by the most severe hypoglycemia among all types of GSDs due to redundant role of G6Pase in converting G6P to glucose in the final step of both gluconeogenesis (GNG) and glycogenolysis pathways.<sup>5–10</sup> G6Pase is primarily expressed in the liver, kidneys, and intestine.<sup>10,11</sup> Liver and kidney G6Pase deficiency leads to the accumulation of G6P and subsequent metabolic complications, such as hypertriglyceridemia, hyperlactacidemia, and hyperuricemia.<sup>12,13</sup> The accumulation of glycogen and lipid in the liver leads to hepatomegaly and may contribute to the development of hepatocellular adenoma (HCA) or carcinoma (HCC) in some patients.<sup>14–18</sup>

The majority of the remaining hepatic GSDs, including types 0, III, VI, and IX, are associated with a milder, fasting, ketotic hypoglycemia due

Received 21 February 2018; accepted 23 April 2018;  
<https://doi.org/10.1016/j.ymthe.2018.04.023>.

**Correspondence:** Bob D. Brown, Dicerna Pharmaceuticals, 87 Cambridgepark Drive, Cambridge, MA 02140, USA.

**E-mail:** [bbrown@dicerna.com](mailto:bbrown@dicerna.com)

**Correspondence:** Chengjung Lai, Dicerna Pharmaceuticals, 87 Cambridgepark Drive, Cambridge, MA 02140, USA.

**E-mail:** [clai@dicerna.com](mailto:clai@dicerna.com)

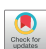

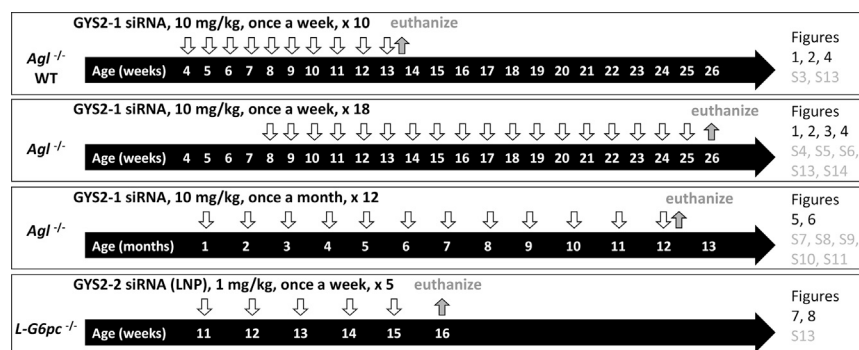

**Figure 1. Schematic Representation of the Experimental Designs for All Presented Studies**

Wild-type (WT), GSD III ( $AgI^{-/-}$ ), and GSD Ia ( $L-G6pc^{-/-}$ ) mice were injected (downward open arrows) with either GYS2-1 or GYS2-2 with different dose levels, dosing regimens, and study durations (taken down denoted with upward filled arrows) as indicated. Age of mice is indicated within horizontal arrows. Results obtained from each experimental protocol are presented in their corresponding figures and supplemental figures as indicated.

to an active GNG pathway in these patients capable of partially maintaining blood glucose homeostasis and compensating for the defective glycogenolysis pathway.<sup>1,19</sup> The increased activity of the GNG pathway from lipid and protein sources in these patients results in increased ketone body levels. GSD III is the most common among all ketotic GSDs.<sup>20</sup> GSD III is caused by the deficiency of GDE (encoded by *AGL*) and is characterized by hepatomegaly and hyperlipidemia, with some patients developing liver damage, such as elevated circulating liver enzymes, fibrosis, cirrhosis, HCA, or HCC.<sup>20–22</sup>

To dissect the mechanisms underlying liver injury associated with hepatic GSDs, we investigated the effect of RNAi-mediated GYS2 enzyme reduction in GSD Ia and GSD III mouse models. We observed that accumulation of abnormally structured glycogen was accompanied by early damage signals, such as hepatocyte proliferation, myofibroblast activation, and mononuclear cell infiltration, leading to the subsequent development of fibrosis and nodule formation in GSD III mice. Silencing of *Gys2* expression effectively reduced glycogen accumulation and prevented all assessed markers of early liver injury and progressive liver damage. Additionally, *Gys2* reduction in a GSD Ia mouse model resulted in decreased glycogen and lipid levels and prevented subsequent apoptosis and cell proliferation.

## RESULTS

### Gys2 mRNA Knockdown Inhibits Glycogen Synthesis in Wild-Type Mice

We identified *Gys2* small interfering RNAs (siRNAs) by sequential screening *in vitro* (Figure S2). Potent siRNAs were then conjugated with N-acetylgalactosamine (GalNAc) sugar residues (designated as GYS2-1) or formulated in lipid nanoparticle (designated as GYS2-2) for specific reduction of *Gys2* mRNA and GYS2 protein expression in liver (Figure S2). We then explored the therapeutic potential of *Gys2* silencing in GSD mouse models (experimental designs summarized in Figure 1). GYS2-1 potently silences *Gys2* mRNA (Figure 2A) and GYS2 protein levels (Figures 2B and 2C) in wild-type mice. Additionally, GYS2-1 and GYS2-2 treatment results in reduction of GYS2 protein and glycogen levels in wild-type mice in nearly all hepatocytes (Figures 2D, 2E, S2G, and S2H), suggesting that both GalNAc and lipid nanoparticle (LNP)-mediated siRNA delivery mechanisms are able to achieve homogeneous delivery of siRNA to hepatocytes and are suitable for further evaluation of the disease mechanism.

### Gys2 mRNA Knockdown Prevents Glycogen Accumulation and Hepatomegaly in the $AgI^{-/-}$ GSD III Mouse Model

To evaluate whether accumulated glycogen molecules trigger liver abnormalities in GSDs, we employed a murine model of GSD III.  $AgI^{-/-}$  mice have a germline mutation in the gene encoding GDE, resulting in accumulation of abnormally structured glycogen that is resistant to efficient breakdown by GLGP during fasting (Figure 2D).<sup>23,24</sup> As reported by others, we also observed that these mice develop hepatomegaly with abnormal histomorphology by four weeks of age (Figure S3),<sup>23</sup> followed by an elevation of circulating liver enzymes and progression to periportal fibrosis by approximately eighteen weeks of age.<sup>23,24</sup>  $AgI^{-/-}$  mice were injected with GYS2-1 weekly from four to thirteen weeks of age or from eight to twenty-six weeks of age (Figure 1). GYS2-1 potently suppressed hepatic *Gys2* mRNA (Figure 2A) and GYS2 protein (Figures 2B and 2C) levels, resulting in a substantial reduction of hepatic glycogen levels in the  $AgI^{-/-}$  mice (Figure 2D). Blockage of glycogen synthesis with chronic dosing of GYS2-1 reverses the hepatomegaly that is characteristic of  $AgI^{-/-}$  mice (Figures 2F and 2G). Chronic dosing of GYS2-1 also reverses histomorphological characteristics of  $AgI^{-/-}$  mice as evidenced by H&E and periodic acid-Schiff (PAS) staining (Figures 3A, S3A, and S3B) until they are similar to their wild-type littermates.

Interestingly, we observed that *Gys2* mRNA and GYS2 protein levels were downregulated in  $AgI^{-/-}$  mice in the absence of treatment when compared with their wild-type littermates (Figures 2A–2C). This observation suggests there may be physiological feedback in  $AgI^{-/-}$  mice to mitigate the accumulation of excess glycogen by downregulation of *Gys2* expression. However, despite this downregulation of *Gys2* expression,  $AgI^{-/-}$  mice still exhibit hepatomegaly and histomorphological characteristics of GSD III, suggesting that the remaining levels of GYS2 enzyme are sufficient to cause accumulation of glycogen in this GDE-deficient background. Importantly, GYS2-1 was able to further reduce the expression of *Gys2* mRNA and GYS2 protein in  $AgI^{-/-}$  mice, resulting in a reversal of the phenotypic characteristics of GSD III (Figures 1, 2, S3A, and S3B). Analysis of four-week-old  $AgI^{-/-}$  mice sacrificed in the absence of treatment indicates that hepatomegaly and abnormal liver morphology occur early in life (Figure S3A),<sup>23</sup> suggesting that the GSD III liver phenotype of  $AgI^{-/-}$  mice is highly reversible with GYS2 reduction.

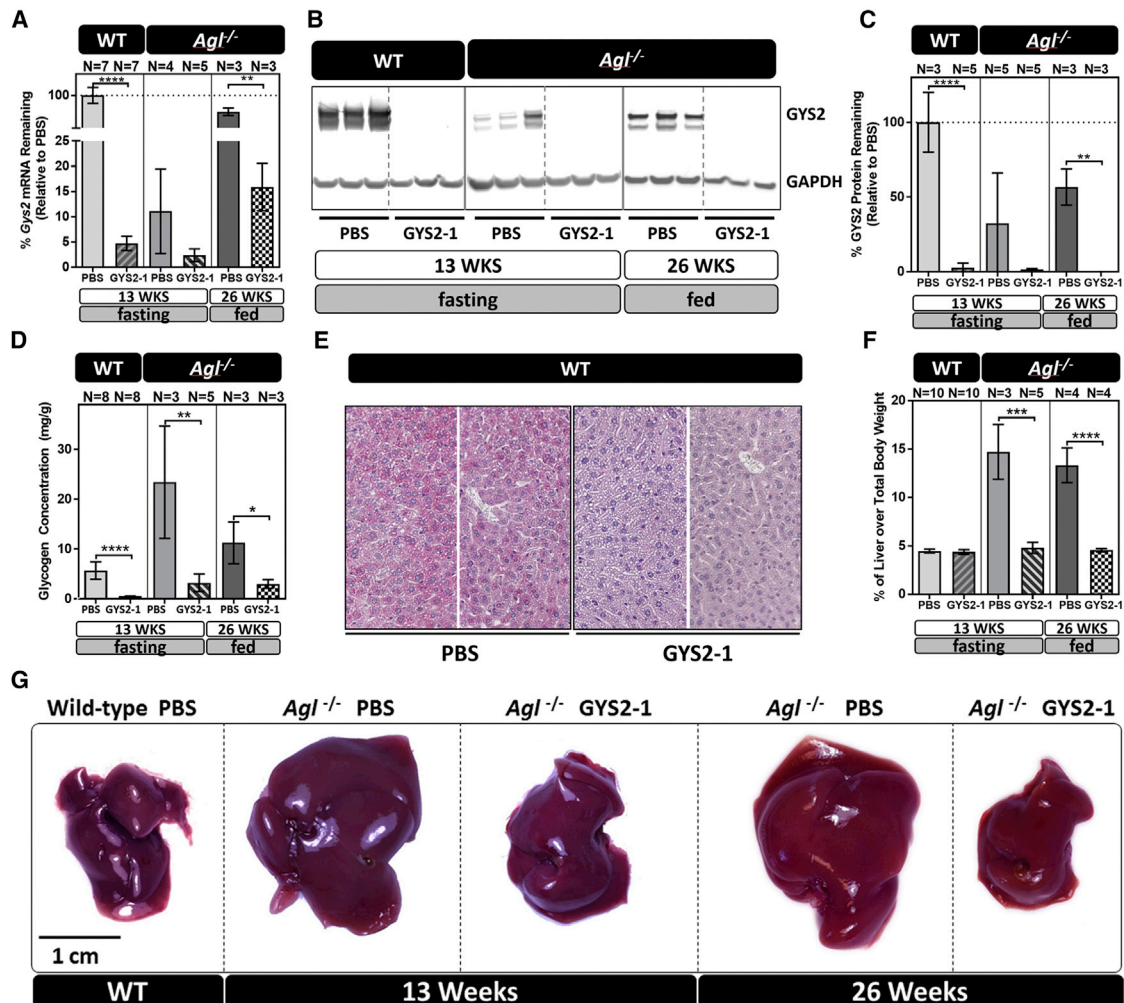

**Figure 2. GYS2-1 Treatment Reduces *Gys2* mRNA, GYS2 Protein Expression, Glycogen Synthesis, and Hepatomegaly in GSD III, *Agl*<sup>-/-</sup> Mice**

The lead *Gys2* siRNA conjugate, GYS2-1, was subcutaneously injected into WT and *Agl*<sup>-/-</sup> mice at a 10 mg/kg dose. Wild-type and *Agl*<sup>-/-</sup> mice were given 10 weekly doses of GYS2-1 starting at 4 weeks of age and sacrificed at 13 weeks of age after a 6-hr fast. In a second experiment, *Agl*<sup>-/-</sup> mice were given 18 weekly doses of GYS2-1 starting at 8 weeks of age and sacrificed at 26 weeks of age. Liver samples were collected 24 hr following the final dose. (A) Results of RT-PCR analysis on the effect of GYS2-1 on *Gys2* mRNA expression in both wild-type (\*\*\*\**p* < 0.0001) and *Agl*<sup>-/-</sup> (\*\**p* ≤ 0.01) mice are shown. (B and C) Western blot analysis (B) and quantification (C) to measure GYS2 protein expression in both wild-type (*p* < 0.0001) and *Agl*<sup>-/-</sup> (\*\**p* ≤ 0.01) mice treated with GYS2-1 is shown. (D) Measurement of glycogen in prepared liver extracts in wild-type (*p* < 0.0001) and *Agl*<sup>-/-</sup> (\*\**p* ≤ 0.01 for 13 weeks and \**p* ≤ 0.05 for 26 weeks) mice treated with GYS2-1. (E) Detection of glycogen levels in formalin-fixed liver tissues in wild-type mice using PAS staining. (F) Liver to body weight ratio was measured in *Agl*<sup>-/-</sup> mice (\*\*\**p* ≤ 0.001 for 13 weeks and \*\*\*\**p* < 0.0001 for 26 weeks) treated with GYS2-1. Data are presented as mean ± SD. Unpaired t test for statistical significance relative to PBS treatment group at each time point. (G) Representative images of livers from each group as indicated. The scale bar represents 1 cm. WT, wild-type littermate.

**Silencing of *Gys2* Protects against Initial and Progressive Liver Injury in the *Agl*<sup>-/-</sup> GSD III Mouse Model**

As the life expectancy of patients with GSD III improves with diet control, cases of long-term liver complications continue to be reported.<sup>25-27</sup> However, the mechanism remains unclear as to how liver damage in *Agl*-deficient patients leads to long-term complications, such as fibrosis, cirrhosis, HCA, and HCC. Immunohistochemistry of the livers of untreated *Agl*<sup>-/-</sup> mice for the cellular proliferation marker Ki67 shows increased clusters of positively stained cells surrounded by hepatocytes containing large vacuoles (Figures 3A, S3B,

and S4). The increased Ki67-positive cells were detected on hepatocytes and non-hepatocytes, identified based on morphology and by immunohistochemistry for expression of cell-type-specific markers in the PBS-treated *Agl*<sup>-/-</sup> mice (Figure 3B). One hypothesis is that liver damage caused by glycogen accumulation induces neighboring cells (hepatocyte or non-hepatocyte) to proliferate, leading to myofibroblast activation in non-hepatocytes and the development of neoplasia in hepatocytes. Livers of *Agl*<sup>-/-</sup> mice did not have elevated activity of apoptotic caspases 3 and 7 (Figure S3C), supporting the hypothesis that slowly progressing liver damage, mediated by a



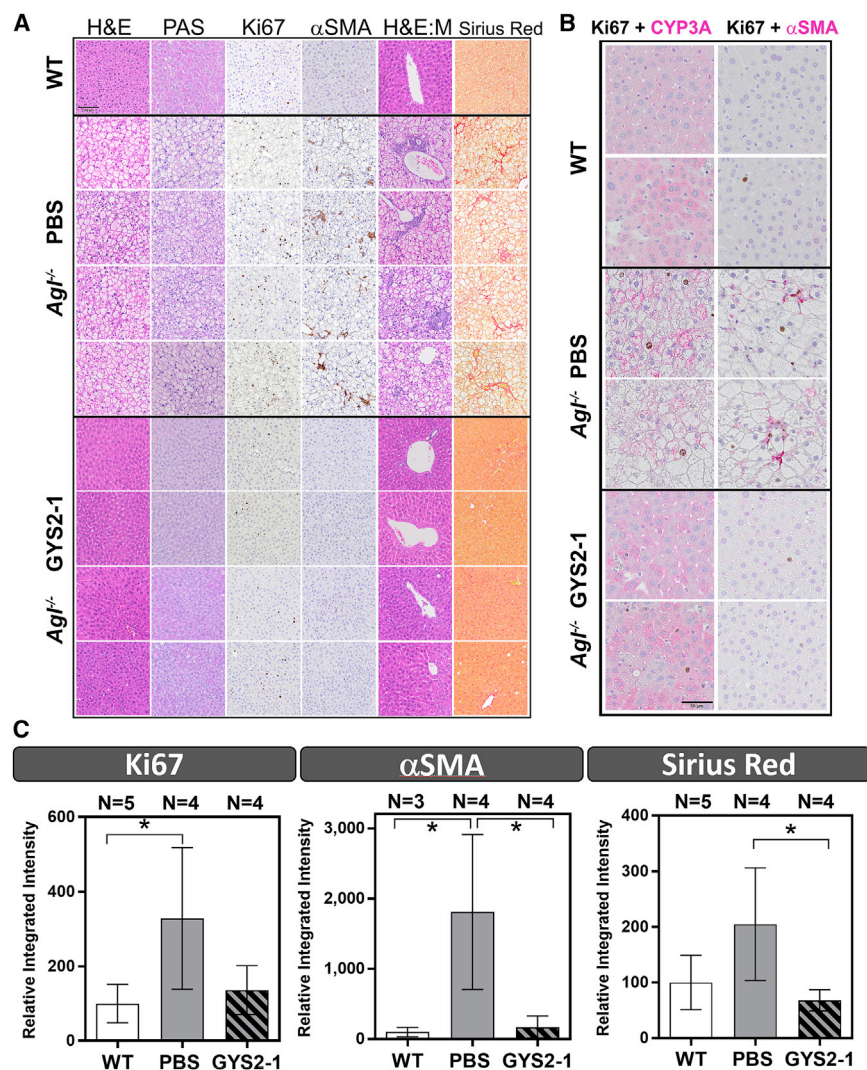

**Figure 3. GYS2-1 Treatment Results in a Normalization of Liver Pathology in an  $Agl^{-/-}$  GSD III Mouse Model**

(A)  $Agl^{-/-}$  mice treated with PBS or GYS2-1 weekly for 18 doses starting at 8 weeks of age. Histological analysis was performed using H&E and PAS staining as indicated. Ki67-positive cells and infiltrated mononuclear cells (H&E:M) were noted in  $Agl^{-/-}$  mice. Immunohistochemistry for  $\alpha$ -smooth muscle actin ( $\alpha$ -SMA) and Sirius Red staining were performed to detect stellate cell activation and fibrosis. Representative images of four individual animals from PBS- or GYS2-1-treated groups are shown. The scale bars represent 100  $\mu$ m. (B) Double staining of Ki67 (dark brown) and CYP3A (cytochrome P450 3A, magenta) or  $\alpha$ -SMA (magenta) was performed to detect cell proliferation in both hepatocytes and non-hepatocytes in livers of  $Agl^{-/-}$  mice. (C) Quantitative analysis of immunohistochemistry of Ki67,  $\alpha$ -SMA, and Sirius Red (\* $p \leq 0.05$ ) staining shown in (A) is shown. Detailed methodology of quantitative analysis can be found in Supplemental Information and Figures S4–S6. Data are presented as mean  $\pm$  SD. Unpaired t test for statistical significance relative to PBS treatment group or wild-type animals (\* $p \leq 0.05$ ) is shown.

non-apoptotic mechanism, induces cell proliferation in the GSD III mouse model. Notably, in  $Agl^{-/-}$  mice injected with GYS2-1, cellular proliferation was reduced to the levels near wild-type littermates as evidenced by immunohistochemistry for Ki67 (Figures 3A, 3C, S3, and S4). We also observed that GYS2-1 prevents infiltration of mononuclear cells (Figure 3A). Importantly, we observed that *Gys2* silencing greatly impeded the development of stellate cell activation and fibrosis in the livers of  $Agl^{-/-}$  mice (Figures 3A–3C and S3–S6). These results suggest that reduction of GYS2 enzyme in the livers of  $Agl^{-/-}$  mice can prevent hepatocyte damage from excess glycogen accumulation and the resulting cell proliferation, myofibroblast differentiation, inflammation, and development of fibrosis.

When compared to their wild-type littermates,  $Agl^{-/-}$  mice also display signs of liver damage with elevated levels of circulating alanine aminotransferase (ALT), aspartate transaminase (AST), and alkaline phosphatase (ALP) that were exacerbated by fasting (Figures 4, 6, and

S3D).<sup>23,24</sup> *Gys2* mRNA silencing with GYS2-1 significantly reduces levels of ALT, AST, and ALP in  $Agl^{-/-}$  mice to near wild-type baseline levels during both fasting and non-fasting conditions (Figures 4, 6, and S3D).

#### Silencing of *Gys2* Prevents Development of Hepatic Nodules in the $Agl^{-/-}$ GSD III Mouse Model

To investigate the long-term effect of inhibiting glycogen synthesis in  $Agl^{-/-}$  mice, animals were injected with GYS2-1 monthly from 1 to 12 months of age (Figure 1). Repeatedly, silencing of *Gys2* shows a tendency toward reducing glycogen synthesis and preventing hepatomegaly, liver toxicity, and fibrosis in  $Agl^{-/-}$  mice (Figures 5, 6, S7, and S8). Importantly, small, sporadic nodules ranging from <1 to 3 mm in diameter were noted in the livers of  $Agl^{-/-}$  mice, but not in GYS2-1-treated group. Histopathological analysis of the nodules identified hepatocytes with varying sizes, shapes, and irregular nuclei with a decrease in the number of vacuoles present (Figures 5 and S9). The largest nodule displays the “pushing border” characteristic indicative of an expanding cell mass that is adjacent to the parenchyma (Figure S9); however, no incidences of the development of hepatocellular carcinoma were observed by histopathology or immunohistochemistry analysis at one year of age (Figures S9 and S10). Increased cellular proliferation was detected in PBS-treated mice in both the parenchymal and nodule compartments at one year of age (Figure 6B), as it was in the younger mice (Figure 3). In contrast, silencing of *Gys2* shows a tendency toward reduction of the proliferative index



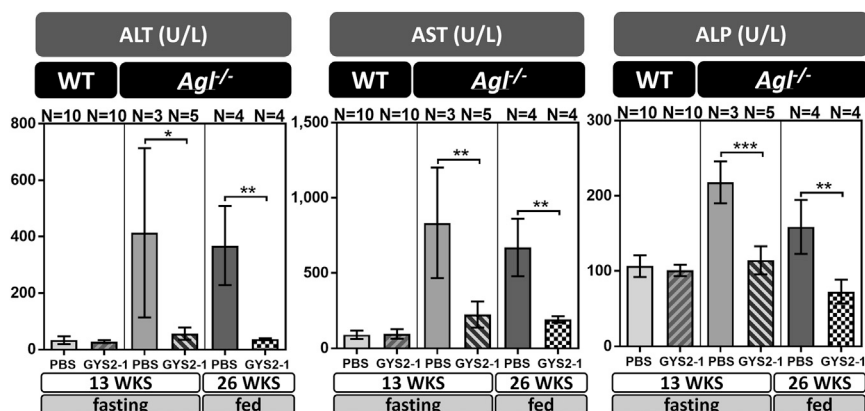

**Figure 4. GYS2-1 Treatment Reduces Circulating Liver Enzymes in an *Agt*<sup>-/-</sup> GSD III Mouse Model**

GYS2-1 was subcutaneously injected into WT or *Agt*<sup>-/-</sup> mice weekly at a 10 mg/kg dose starting at 4 or 8 weeks of age and sacrificed at 13 or 26 weeks of age, respectively, as indicated. Analysis of serum samples was performed to measure circulating liver enzymes. ALT, alanine transaminase; AST, aspartate aminotransferase; ALP, alkaline phosphatase. Data are presented as mean ± SD. Unpaired t test for statistical significance relative to PBS treatment group. WKS, weeks. \*\*\* $p \leq 0.001$ ; \*\* $p \leq 0.01$ ; \* $p \leq 0.05$ .

(Figure 6C). These results suggest that *Gys2* silencing effectively prevents long-term liver injury and hyperplasia in the GSD III mouse model. Whereas small numbers of animals were included in this study, normalization of the liver phenotype with a high degree of homogeneous morphology throughout the entire liver was achieved with GYS2-1 treatment that was comparable to that of their wild-type littermates (Figures 5, 6, S7, and S8), suggesting that a GalNAc-mediated RNAi approach to prevent the accumulation of abnormally structured glycogen is effective in unbiasedly resolving the underlying disorder of all hepatocytes (Figure S11).

#### Reduction of GYS2 Prevents Lipid Deposition in Hepatocytes in a GSD Ia Mouse Model

In GSD Ia, the loss of G6Pase activity leads to the accumulation of glycogen and lipid in hepatocytes. Here, we evaluated the effect of reducing *Gys2* expression in a GSD Ia mouse model with liver-specific deletion of *G6pc* (*L-G6pc*<sup>-/-</sup>). The *L-G6pc*<sup>-/-</sup> mice develop liver injury representative of GSD Ia but with less severe hypoglycemia than patients.<sup>28</sup> *L-G6pc*<sup>-/-</sup> mice were injected with the LNP-mediated GYS2-2 siRNA weekly for 5 weeks (Figure 1). Similar to our observations in *Agt*<sup>-/-</sup> mice, we demonstrate that *Gys2* silencing greatly reduced hepatic *Gys2* mRNA expression (Figure 7A), resulting in a reduction of hepatic glycogen accumulation (Figures 7B and 7E). In addition, *L-G6pc*<sup>-/-</sup> mice treated with GYS2-2 displayed similar liver morphology to wild-type controls whereas untreated *L-G6pc*<sup>-/-</sup> mice showed glycogen and lipid accumulation (Figure 7E). In this short-term treatment experiment, we observed a trend of decreased hepatic G6P accumulation with reduced *Gys2* expression (Figure 7C), corresponding to the observed reduction in hepatic glycogen levels (Figure 7B), which serves as one of the main sources of hepatic G6P production from glycogenolysis. Reduction of elevated circulating ALT and AST was also observed in *L-G6pc*<sup>-/-</sup> mice with *Gys2* silencing (Figure 8A). The activity of apoptotic caspases 3 and 7 and the proliferative index were also increased in *L-G6pc*<sup>-/-</sup> mice compared to wild-type controls (Figures 7D, 7E, and 8B), suggesting that lipid deposition and damage-induced cellular proliferation in the liver are linked to apoptosis in the *L-G6pc*<sup>-/-</sup> GSD Ia mouse model. A tendency toward decreased caspase 3 and caspase 7 activity (not statistically signifi-

cantly;  $p = 0.24$ ) was observed in livers of *L-G6pc*<sup>-/-</sup> mice after *Gys2* silencing (Figure 8B). All *L-G6pc*<sup>-/-</sup> animals (both PBS and GYS2-2-treated groups) exhibit nearly undetectable *G6pc* mRNA expression levels (Figure S12) and severe fasting hypoglycemia (Figure S13), suggesting that the observed efficacy is specific to *Gys2* silencing and not to random variation in recombination efficiency.<sup>28</sup> Our data thus suggest that reduction of hepatic glycogen levels by *Gys2* silencing results in the decline of hepatic G6P buildup and lipid deposition, thereby preventing damage-induced cell proliferation in the livers of *L-G6pc*<sup>-/-</sup> mice (Figures 7 and 8).

In summary, our results suggest that glycogen accumulation and lipid deposition are able to initiate liver damage cascades, resulting in increased cellular proliferation of hepatocytes and non-hepatocytes in both GSD Ia and GSD III mouse models. Suppression of *Gys2* mRNA expression through an RNAi approach reduces glycogen and fatty acid accumulation homogeneously and prevents subsequent liver damage of nearly all hepatocytes in mouse models of GSD Ia and GSD III.

#### DISCUSSION

Short- and long-term liver complications occur in many types of GSDs, but there is currently no clear understanding of the mechanisms underlying disease progression. We demonstrate that accumulation of glycogen triggers the initial damage cascade, and this injury can be effectively reversed by *Gys2* silencing in animal models of GSD Ia and III. However, *Gys2* silencing has no effect on preventing fasting hypoglycemia (Figure S13). Whereas *Gys2*-deficient patients (GSD 0) have mild hypoglycemia and liver complications,<sup>29–31</sup> hypoglycemia was not exacerbated by *Gys2* silencing (Figure S13). Thus, targeting GYS2 could provide a potentially safe therapeutic approach for preventing liver complications, such as HCA and HCC in GSD Ia and III.

#### Mechanisms Underlying Progression of Liver Injury in Hepatic GSDs

Our data suggest that aberrant accumulation of glycogen initiates sequential events that are responsible for long-term liver complications. However, each hepatic GSD also exhibits unique phenotype.

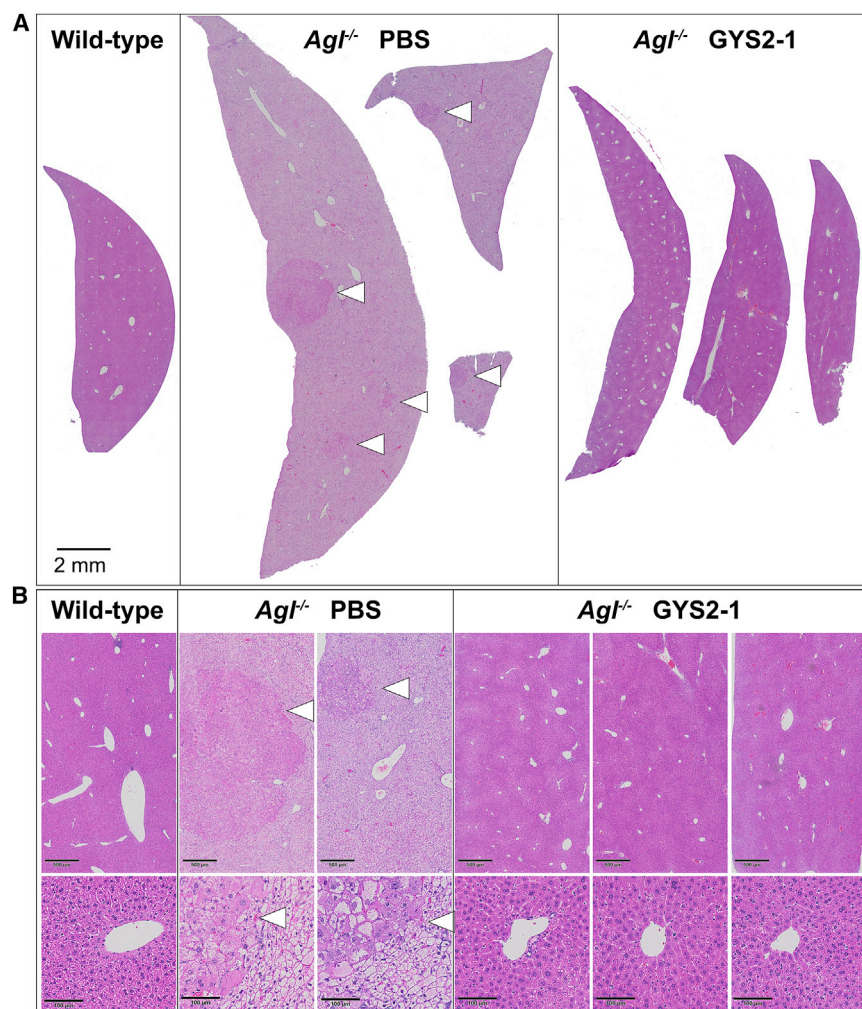

**Figure 5. GYS2-1 Treatment Prevents Nodule Development in the *Agl*<sup>-/-</sup> GSD III Mouse Model**

*Agl*<sup>-/-</sup> mice were treated with PBS or GYS2-1 monthly for 12 doses starting at one month of age. Liver samples were collected 72 hr following the final dose. (A) Histological analysis was performed in prepared liver samples. The scale bar represents 100  $\mu$ m. Each liver image shows a representative section from an individual animal. (B) Higher magnification images of sections of the nodules are shown. The scale bars represent 500 or 100  $\mu$ m in the upper or lower panel, respectively.

intervention approaches, an area where the field has been progressing slowly, with the exception of advances in dietary control and gene therapy.<sup>32</sup>

GSD III patients develop fasting, ketogenic hypoglycemia as a result of fatty acid oxidation during gluconeogenesis as a means to compensate for the deficiency of glycogenolysis.<sup>19</sup> Thus, we hypothesized that gluconeogenesis activity would be increased in GSD III mice during fasting in order to maintain blood glucose levels. As hypothesized, we detected an elevation of ketone bodies in *Agl*<sup>-/-</sup> GSD III mice during fasting (Figure S13C). We did not detect any significant difference in the elevation of ketone bodies following treatment of GYS2-1, suggesting *Gys2* silencing has no effect on gluconeogenesis (Figure S13C). This result also suggests that abnormally structured glycogen, and not ketone bodies, causes liver toxicity and subsequent complications in GSD III. Interestingly,

Indeed, GSD III hepatomegaly is characterized by the accumulation of abnormal glycogen (called phosphorylase limit dextrin), whereas glycogen molecule is normal in GSD I. Moreover, neutral lipids are accumulated in GSD Ia and lead to the development of steatosis. Whereas HCC development generally occurs on fibrotic or cirrhotic liver, HCC develops from an HCA transformation event in GSD Ia in the absence of fibrosis. In addition, hepatic diseases of GSD Ia and GSD III are characterized by different metabolic remodeling events that could play distinguished roles in liver tumorigenesis.<sup>13</sup> For GSD III, increased cell proliferation was observed long before hyperplastic nodule formation. Similar to other fibrotic chronic liver diseases, we observed that proliferation and differentiation of stellate cells proceed the development of fibrosis. Our histology data suggest that inflammation may also play an important role for liver disease progression. In GSD Ia mice, our results suggest that reduction of glycogen content by *Gys2* silencing led to a decrease of lipid accumulation, where modifications of metabolism subsequently prevent liver injury. Our understanding of mechanisms and development of liver injury of GSDs can further provide insight into potential

D,L-3-hydroxybutyrate, a synthetic ketone, has been used as an alternative energy source for treating a few GSD III patients with cardiomyopathy where no aggravated liver phenotype was reported, suggesting elevated ketone bodies will not cause liver complications in GSD III patients.<sup>33,34</sup>

#### Silencing Hepatic *GYS2* as a Potential Therapeutic Approach: Advantages and Limitations

We demonstrate that *Gys2* silencing effectively and rapidly reversed the disease phenotype in GSD Ia and GSD III animal models, supporting its therapeutic potential for preventing liver complications. Accumulation of abnormally structured glycogen in hepatocytes directly or indirectly causes stress; however, reversal can be achieved rapidly by reducing glycogen synthesis. A similar but less specific approach has been reported with rapamycin, an mTOR inhibitor, which moderately reduced *GYS2* expression, glycogen accumulation, and liver fibrosis in a canine model of GSD III with a range of other mTOR targets also affected.<sup>35</sup> These results further support the role of accumulated glycogen in the disease pathology of GSD



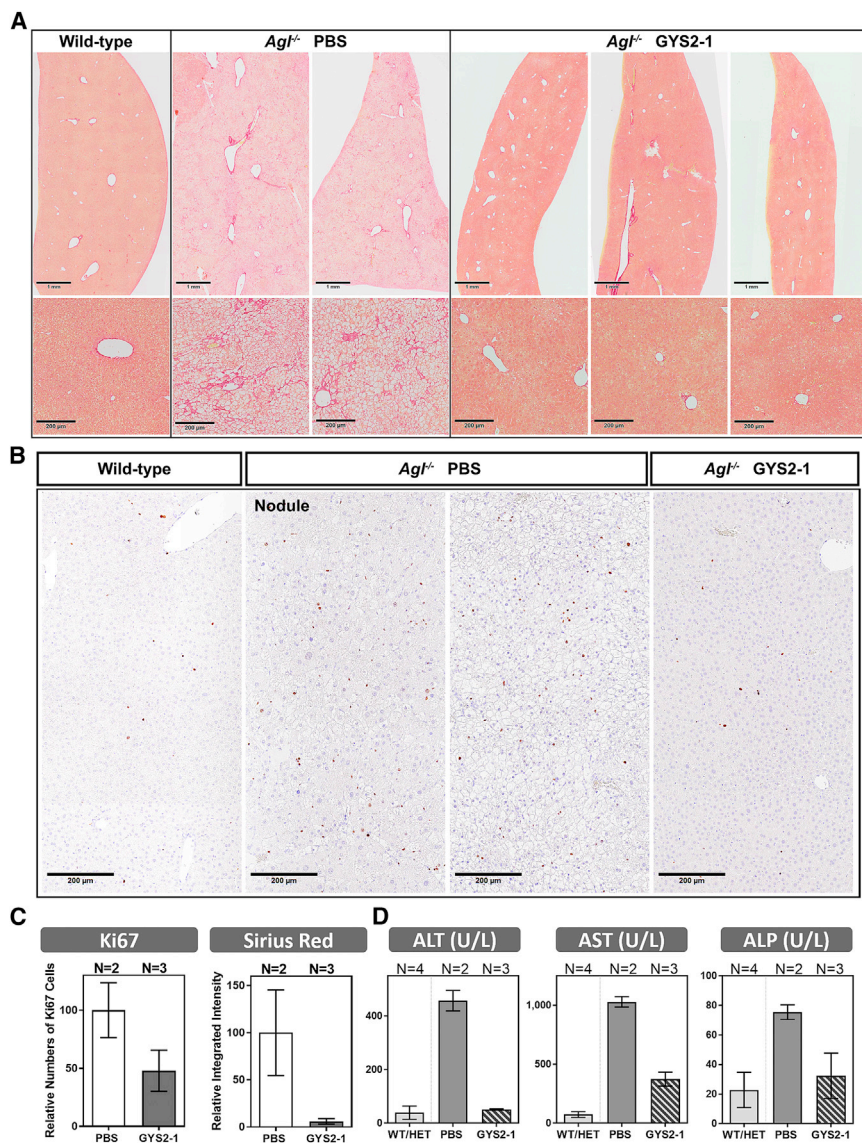

**Figure 6. GYS2-1 Treatment Prevents Fibrosis in the *Agt*<sup>-/-</sup> GSD III Mouse Model**

*Agt*<sup>-/-</sup> mice were treated with PBS or GYS2-1 monthly for 12 doses starting at 1 month of age. (A) Liver samples were collected 72 hr following the final dose and analyzed for collagen deposition using Sirius Red staining. Lower panel represents higher magnification of images in upper panel. Representative images of individual animals from PBS- or GYS2-1-treated groups are shown. The scale bars represent 1 mm or 200 μm in the upper or lower panel, respectively. (B) Analysis of Ki67 staining to detect hepatocellular proliferation in *Agt*<sup>-/-</sup> mice. Representative images of nodule and non-nodule areas of individual animals are shown. The scale bars represent 200 μm. (C) Quantitative analysis of immunohistochemistry of Ki67 and Sirius Red staining shown in (A) and (B), respectively, is shown. Detailed methodology of quantitative analysis can be found in [Supplemental Information](#) and [Figures S4](#) and [S8](#). (D) Analysis of serum samples was performed to measure circulating liver enzymes. Data are presented as mean ± SD.

igeneis can theoretically initiate from any small population of damaged hepatocytes that are actively proliferating, making the homogeneous silencing of *Gys2* and the resulting prevention of hepatocyte damage particularly valuable for preventing disease progression.

III and the therapeutic potential of *GYS2* silencing. In addition to GSD Ia and III, liver complications are also associated with other types of GSDs, including types VI and IX.<sup>36,37</sup> Mechanistically, reduction of *GYS2* expression with siRNA treatment should also reduce glycogen accumulation of GSD VI and IX. However, the effect of *Gys2* silencing has yet to be confirmed in animal models of these GSDs.

RNAi-mediated inhibition of glycogen synthesis has the advantage to unvaryingly reach and correct glycogen accumulation in nearly all hepatocytes ([Figures 5, 6, S2G, S2H, S8, and S11](#)), subsequently eliminating abnormal cell proliferation throughout. This is particularly important for designing therapeutics aimed at preventing hepatic malignancies in livers where widespread and sustained cell proliferation has been observed ([Figures 3, 6, and S4](#)). Tumor-

weakness or heart complications.<sup>37–39</sup> As expected, GYS2-1 treatment does not reduce glycogen accumulation in skeletal muscle due to the liver specificity of the GalNAc conjugation delivery approach ([Figure S14](#)). Theoretically, *GYS1*, which is predominantly expressed in both muscle and heart tissue, where it serves as the main enzyme for glycogen synthesis, can be targeted to improve myopathy and cardiomyopathy in affected patients. An alternative tissue-specific ligand-receptor approach other than the GalNAc-asialoglycoprotein receptor system utilized here will need to be identified for skeletal and cardiac muscle-specific delivery<sup>40</sup> before future investigation of RNAi-mediated silencing of *Gys1*. Similarly, this current limitation of liver-specific delivery of RNAi will need to be resolved before we could prevent against kidney damage that is associated with high percentage of GSD I patients.<sup>41</sup>



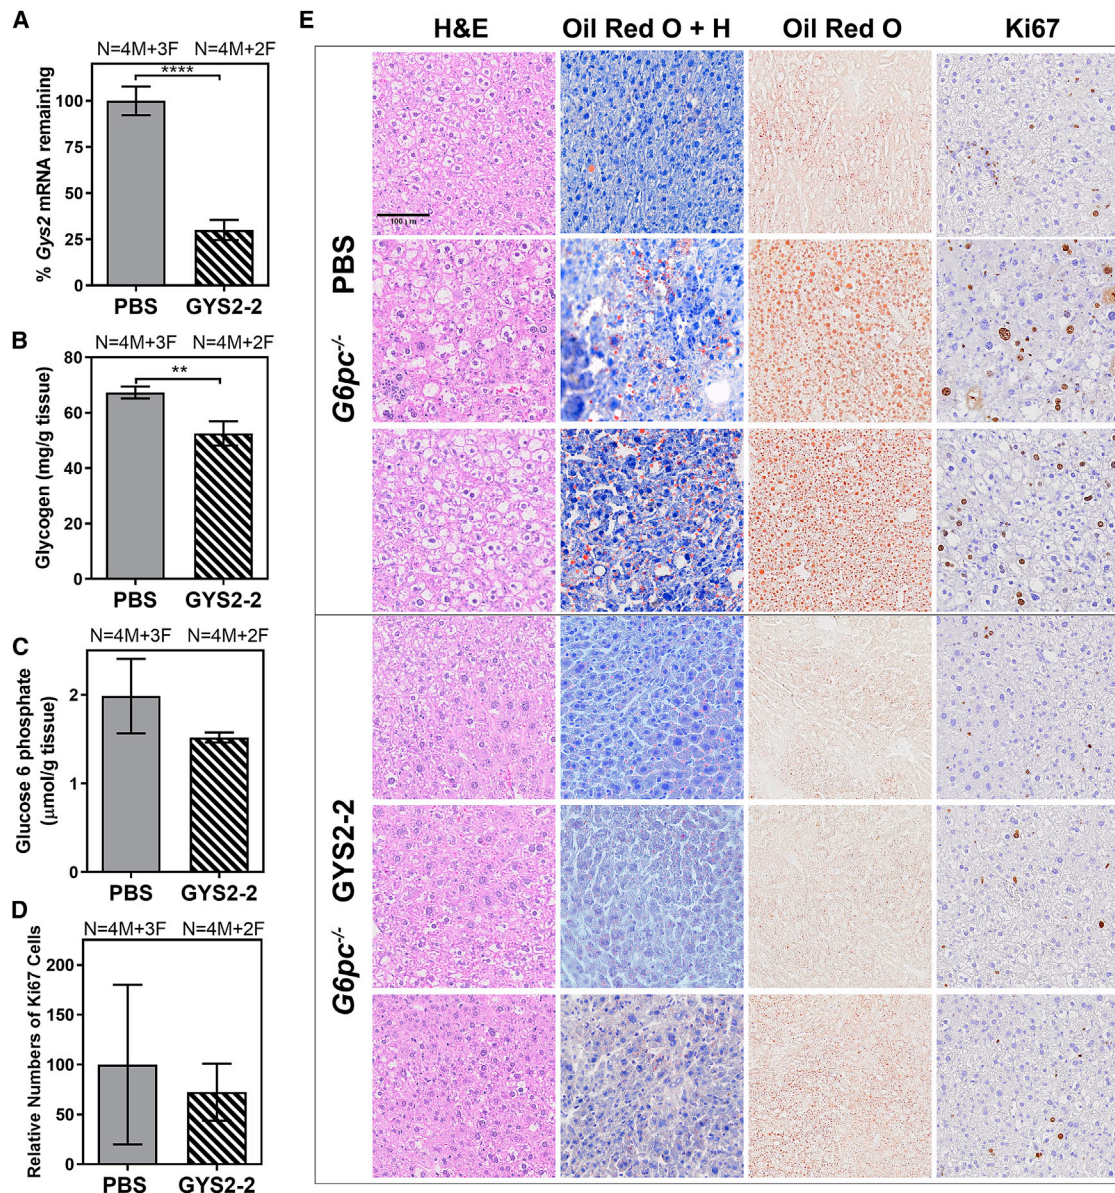

**Figure 7. Silencing of Gys2 mRNA Expression Reduces Glycogen Accumulation and Restores Normal Liver Morphology in a L-G6pc<sup>-/-</sup> GSD Ia Mouse Model** L-G6pc<sup>-/-</sup> mice were dosed intravenously with PBS or GYS2-2 (Gys2 siRNA formulated in lipid nanoparticle) weekly for 5 weeks. Liver samples were collected 48 hr following the final dose. (A) RT-PCR analysis was performed to measure Gys2 mRNA expression in L-G6pc<sup>-/-</sup> mice (\*\*\*\*p < 0.0001). (B) Measurement of glycogen content in liver extracts was performed in L-G6pc<sup>-/-</sup> mice (\*\*p ≤ 0.01). (C) Glucose-6-phosphate levels were measured in L-G6pc<sup>-/-</sup> mice treated with PBS or GYS2-2. (D) Quantitative analysis of Ki67-positive liver cells in L-G6pc<sup>-/-</sup> mice. Numbers (N) of male (M) and female (F) animals in each group are indicated. (E) Histological analysis to characterize histopathology of L-G6pc<sup>-/-</sup> mice using H&E, Oil Red O staining, and Ki67 immunohistochemistry. Liver samples stained with both Oil Red O and hematoxylin (Oil Red O + H) are indicated. Representative images of three individual animals from PBS- or GYS2-2-treated groups are shown. The scale bar represents 100  $\mu\text{m}$ . Data are presented as mean  $\pm$  SD. Unpaired t test for statistical significance relative to PBS control group.

In summary, our preclinical studies suggest that glycogen accumulation directly or indirectly induces a liver injury cascade in GSD animal models, supporting further exploration of applying RNAi to inhibit glycogen synthesis as a universal therapeutic approach for GSD-related liver disease.

## MATERIALS AND METHODS

### Selection of Lead Gys2 siRNAs

GYS2-1 and GYS2-2 siRNAs were identified through a process of large-scale screening of siRNAs for mRNA knockdown activity *in vitro* in HEK293 cells stably expressing mouse Gys2 (Figure S2).

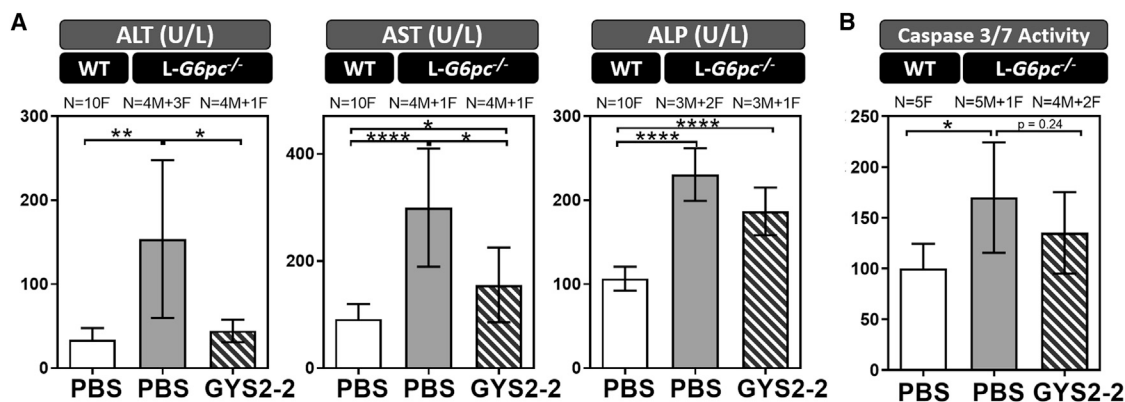

**Figure 8. Silencing of *Gys2* mRNA Expression Reduces Liver Toxicities in a *L-G6pc*<sup>-/-</sup> GSD Ia Mouse Model**

*L-G6pc*<sup>-/-</sup> mice were dosed intravenously with PBS or GYS2-2 weekly for 5 weeks. Liver and blood samples were collected 48 hr following the final dose. (A) Analysis of serum samples was performed to measure circulating liver enzymes. (B) Measurement of caspase-3/-7 activity was performed on liver extracts to detect apoptosis. Numbers (N) of male (M) versus female (F) animals in each group are indicated. Unpaired t test for statistical significance relative to PBS control group or wild-type animal (\*\*\*\**p* < 0.0001; \*\*\**p* ≤ 0.001; \*\**p* ≤ 0.01; \**p* ≤ 0.05). Data are presented as mean ± SD.

RNA strands for siRNA duplexes were synthesized purified at Integrated DNA Technologies (Coralville, IA). The GYS2-1 siRNA had a 36-mer and 22-mer duplex RNA structure, with a 36-nt sense strand composed of modified RNA and GalNAc conjugation that was annealed to a 22-nt modified RNA antisense strand. The GYS2-2 had a 25-mer and 27-mer duplex RNA structure with a 25-nt modified sense strand annealed to a 27-nt modified RNA antisense strand. The GYS2-2 siRNA duplex was formulated in lipid nanoparticles. The siRNAs were modified with either 2'-OME or 2'-F on their sugar moieties.

#### Generation of GSD Mouse Models and *In Vivo* Testing

All animal experiments complied with the animal protocols approved by Dicerna's Institutional Animal Care and Use Committees (IACUCs). Mice were kept in a pathogen-free facility, housed using an Innovive disposable caging system with corn cob bedding (Innovive, San Diego, CA) with free access to Picolab diet for research animals by Purina (Scott Pharma, Marlborough, MA) and water unless otherwise noted. All experiments were done during the 12-hr light cycle. CD-1 mice (Charles River Laboratories, Wilmington, MA) were used for *in vivo* screening of *Gys2* siRNA activity. C57BL/6 mice (Harlan Laboratories, Indianapolis, IN) were used for testing the efficacy of the lead GYS2-1 and GYS2-2 siRNA.

*Ag1*<sup>-/-</sup> mice were produced from embryonic stem cells (ESCs) with a knockout of the *Ag1* gene, which were acquired from the European Conditional Mouse Mutagenesis Program (EUCOMM, Germany). ESC injections and the generation of heterozygous *Ag1*<sup>+/-</sup> mice were performed by geneOway (Lyon, France). Heterozygous *Ag1*<sup>+/-</sup> mice were bred to homozygous for all studies. Wild-type and heterozygous littermates were used as controls.

*L-G6pc*<sup>-/-</sup> mice were generated and maintained as described previously.<sup>11,28</sup>

*Ag1*<sup>-/-</sup> and *L-G6pc*<sup>-/-</sup> animals were used to evaluate the efficacy of GYS2-1 and GYS2-2, respectively. GalNAc-conjugated siRNA (GYS2-1) was injected subcutaneously, and LNP-formulated siRNA (GYS2-2) was administered intravenously. Blood samples were collected via tail vein (interim measurement) or cardiac puncture (terminal measurement) and used either as whole blood or processed to serum and plasma. *Ag1*<sup>-/-</sup> mice were subjected to six hours of fasting prior to study termination except where fed state indicated. *L-G6pc*<sup>-/-</sup> mice were subjected to six hours of fasting during week four, after which blood samples were taken. At study termination, mice were euthanized according to IACUC guidelines and liver tissue samples were collected. Liver samples were stored in RNeasy lysis buffer (Qiagen, Crawley, UK) for RNA preparation, fresh frozen in liquid nitrogen, or fixed in 10% neutral-buffered formalin (VWR International, Radnor, PA).

#### Analysis of Blood Chemistry Parameters

Interim blood glucose measurements were made on whole blood using a glucometer. Terminal blood collections were processed to serum and plasma for measurement of blood chemistry parameters. Serum chemistry and blood glucose levels were measured by IDEXX BioResearch Laboratories (Grafton, MA). Blood glucose measurements were confirmed using a glucose assay kit (Abcam, Cambridge, MA) according to the manufacturer's instructions. ALT activity assay kit (Abcam, Cambridge, MA) was used for time course measurement of ALT according to the manufacturer's instructions. For *L-G6pc*<sup>-/-</sup> mice, plasma glucose, cholesterol, and triglycerides were analyzed as described.<sup>11,28</sup>

#### RNA Preparation and Real-Time PCR

Tissue samples were homogenized in QIAzol Lysis Reagent using TissueLyser II (QIAGEN, Valencia, CA). RNA was then purified using MagMAX Technology according to manufacturer instructions (Thermo Fisher Scientific, Waltham, MA). High-capacity cDNA



reverse transcription kit (Thermo Fisher Scientific, Waltham, MA) was used to prepare cDNA. Mouse-specific *Gys2* and *Hprt1* primers (Integrated DNA Technology, Coralville, IA) were used for PCR on a CFX96 or CFX384 Real-Time PCR Detection System (Bio-Rad, Hercules, CA).

#### Western Blot

Tissue lysates were prepared using TissueLyser II (QIAGEN, Valencia, CA) with T-PER Tissue Protein Extraction Reagent and protease inhibitor cocktail (Thermo Fisher Scientific, Waltham, MA). Total protein concentration was measured by BCA Protein Assay (Thermo Fisher Scientific, Waltham, MA), and equal protein concentrations were resolved by NuPAGE 4%–12% Bis-Tris SDS-PAGE (Thermo Fisher Scientific, Waltham, MA). Electrophoresed proteins were transferred to nitrocellulose membranes using the iBlot Dry Blotting System (Thermo Fisher Scientific, Waltham, MA) and blocked with Odyssey Blocking Buffer (Li-Cor Biosciences, Lincoln, NE). Membranes were then incubated with rabbit anti-glycogen synthase antibody (Cell Signaling Technology, Danvers, MA) and with mouse anti-glyceraldehyde 3-phosphate dehydrogenase antibody (Abcam, Cambridge, MA). Anti-rabbit IRDye 680 and anti-mouse IRDye 800 secondary antibodies (Li-Cor Biosciences, Lincoln, NE) were used for detection, and signal intensity was measured using the Odyssey Infrared Imaging System (Li-Cor Biosciences, Lincoln, NE).

#### Measurement of Liver Glycogen and Glucose-6-Phosphate Levels

Tissue lysates were prepared in water using TissueLyser II (QIAGEN, Valencia, CA). Tissue homogenate was split into two samples of equal volume. The first sample (Glycogen) was incubated at 95°C for 10 min and then centrifuged to isolate the supernatant. The supernatant was diluted in water and analyzed by a Glycogen Assay Kit (Abcam, Cambridge, MA). The second sample was immediately centrifuged to isolate the supernatant, which was used to measure total protein concentration by BCA Protein Assay (Thermo Fisher Scientific, Waltham, MA). Measured glycogen levels were normalized to total protein concentration.

Concentrations of G6P in *L-G6pc<sup>-/-</sup>* mouse livers were measured as described previously.<sup>28</sup>

#### Histological and Immunohistochemistry Analysis

Tissues were fixed in 10% neutral-buffered formalin overnight and then transferred to 70% ethanol. Embedding in paraffin, preparation of slides, and H&E staining was done at Mass Histology Service (Worcester, MA). PAS (Sigma-Aldrich, St. Louis, MO) and Sirius Red (Abcam, Cambridge, MA) staining were performed according to the manufacturer's instructions. For immunohistochemistry experiments, paraffin sections were deparaffinized and rehydrated. Heat-mediated antigen retrieval (citrate buffer [pH 6.0]) was performed for Ki67 immunohistochemistry samples. Endogenous peroxidases and alkaline phosphatase were blocked with BLOXALL solution (Vector Laboratories, Burlingame, CA). Rabbit monoclonal anti-Ki67 antibody (1:100 dilution; Abcam, Cambridge, MA), rabbit

monoclonal anti-alpha smooth muscle actin antibody (1:200 dilution; Abcam, Cambridge, MA), and mouse monoclonal anti-CYP3A antibody (1:50 dilution; Santa Cruz Biotechnology, Dallas, TX) were diluted in SignalStain Antibody Diluent (Cell Signaling Technology, Danvers, MA) and incubated overnight at 4°C. Binding of the primary antibody was detected using a goat anti-rabbit immunoglobulin G (IgG) horseradish peroxidase (HRP) antibody (Antibodies-online, Atlanta, GA) and SignalStain DAB Substrate Kit (Cell Signaling Technology, Danvers, MA). Oil Red O Lipid Stain was performed on frozen tissue samples according to the manufacturer's instructions (Abcam, Cambridge, MA) in the presence or absence of hematoxylin. PAS staining was performed on formalin-fixed tissue samples according to the manufacturer's instructions (Sigma-Aldrich, St. Louis, MO). Results were visualized using an Olympus BX51, a Nikon Eclipse Ti microscope, and an Olympus BX61VS slide scanner using Image Pro Premier 9.1, NIS-Elements BR3.2, and Olympus VS-ASW image analysis software, respectively. Quantitative analysis of immunohistochemistry was performed using Olympus cellSens software. Briefly, for each tissue section, five regions of interest (ROIs) were selected, and an appropriate intensity threshold to specifically identify stained areas was set. Object counts and intensity were measured using an algorithm for each ROI. Importantly, the size of the ROI and the intensity threshold were kept constant for all tissue sections to be compared directly.

#### Assessment of Caspase Activity in Mouse Liver Tissue

Detection of caspase 3 and caspase 7 activity in mouse livers was performed essentially as described.<sup>42</sup> 100 µg/mL extract was mixed with an equal volume of Caspase-Glo Reagent (Promega, Madison, WI) and incubated at room temperature before reading on a SpectraMax M5 Plate Reader (Molecular Devices, Sunnyvale, CA).

#### Measurement of Ketone Body Levels

Ketone body levels were measured with Ketone Body Assay kit in terminal serum samples from wild-type and *Agl<sup>-/-</sup>* mice according to the manufacturer's instructions (Sigma-Aldrich, St. Louis, MO).

#### SUPPLEMENTAL INFORMATION

Supplemental Information includes fourteen figures and can be found with this article online at <https://doi.org/10.1016/j.ymthe.2018.04.023>.

#### AUTHOR CONTRIBUTIONS

Conceived and Designed Experiments, N.P., B.D.B., and C.L.; Performed the Experiments, N.P., J.G., W.Z., M.D., R.D., M.G., U.S., J.-S.Y., A.S., N.V., M.R., and G.M.; Analyzed the Data, N.P., J.G., F.R., and H.D.; Contributed Reagents/Material/Analysis Tools, R.S., B.K., and W.W.; Wrote the Manuscript, N.P., F.R., B.D.B., and C.L.

#### CONFLICTS OF INTEREST

N.P., J.G., W.Z., R.D., M.D., U.S., J.-S.Y., N.V., R.S., B.K., A.S., W.W., M.A., H.D., B.D.B., and C.L. are or were employees of Dicerna Pharmaceuticals, which is developing siRNAs as therapeutics. M.G., M.R.,



G.M., and F.R. have received research grant support from Dicerna Pharmaceuticals.

## ACKNOWLEDGMENTS

We thank Doug Fambrough, David Miller, Jennifer Lockridge, and Jim Weissman for their review of this manuscript. We thank Gernew Desta for helping with animal care.

## REFERENCES

- Wolfsdorf, J.I., and Weinstein, D.A. (2003). Glycogen storage diseases. *Rev. Endocr. Metab. Disord.* 4, 95–102.
- Akman, H.O., Raghavan, A., and Craigen, W.J. (2011). Animal models of glycogen storage disorders. *Prog. Mol. Biol. Transl. Sci.* 100, 369–388.
- Han, H.S., Kang, G., Kim, J.S., Choi, B.H., and Koo, S.H. (2016). Regulation of glucose metabolism from a liver-centric perspective. *Exp. Mol. Med.* 48, e218.
- Adeva-Andany, M.M., González-Lucán, M., Donapetry-García, C., Fernández-Fernández, C., and Ameneiros-Rodríguez, E. (2016). Glycogen metabolism in humans. *BBA Clin.* 5, 85–100.
- Chou, J.Y., and Mansfield, B.C. (2008). Mutations in the glucose-6-phosphatase-alpha (G6PC) gene that cause type Ia glycogen storage disease. *Hum. Mutat.* 29, 921–930.
- Chou, J.Y., Matern, D., Mansfield, B.C., and Chen, Y.T. (2002). Type I glycogen storage diseases: disorders of the glucose-6-phosphatase complex. *Curr. Mol. Med.* 2, 121–143.
- Moses, S.W. (2002). Historical highlights and unsolved problems in glycogen storage disease type I. *Eur. J. Pediatr.* 161 (Suppl 1), S2–S9.
- Ozen, H. (2007). Glycogen storage diseases: new perspectives. *World J. Gastroenterol.* 13, 2541–2553.
- Kishnani, P.S., Austin, S.L., Abdenur, J.E., Arn, P., Bali, D.S., Boney, A., Chung, W.K., Dagli, A.I., Dale, D., Koeberl, D., et al.; American College of Medical Genetics and Genomics (2014). Diagnosis and management of glycogen storage disease type I: a practice guideline of the American College of Medical Genetics and Genomics. *Genet. Med.* 16, e1.
- Soty, M., Gautier-Stein, A., Rajas, F., and Mithieux, G. (2017). Gut-brain glucose signaling in energy homeostasis. *Cell Metab.* 25, 1231–1242.
- Mutel, E., Gautier-Stein, A., Abdul-Wahed, A., Amigó-Correig, M., Zitoun, C., Stefanutti, A., Houberton, I., Tourette, J.A., Mithieux, G., and Rajas, F. (2011). Control of blood glucose in the absence of hepatic glucose production during prolonged fasting in mice: induction of renal and intestinal gluconeogenesis by glucagon. *Diabetes* 60, 3121–3131.
- Sever, S., Weinstein, D.A., Wolfsdorf, J.I., Gedik, R., and Schaefer, E.J. (2012). Glycogen storage disease type Ia: linkage of glucose, glycogen, lactic acid, triglyceride, and uric acid metabolism. *J. Clin. Lipidol.* 6, 596–600.
- Gjorgjieva, M., Oosterveer, M.H., Mithieux, G., and Rajas, F. (2016). Mechanisms by which metabolic reprogramming in GSD1 liver generates a favorable tumorigenic environment. *J. Inborn Errors Metab. Screen.* 4, 2326409816679429.
- Franco, L.M., Krishnamurthy, V., Bali, D., Weinstein, D.A., Arn, P., Clary, B., Boney, A., Sullivan, J., Frush, D.P., Chen, Y.T., and Kishnani, P.S. (2005). Hepatocellular carcinoma in glycogen storage disease type Ia: a case series. *J. Inherit. Metab. Dis.* 28, 153–162.
- Wang, D.Q., Fiske, L.M., Carreras, C.T., and Weinstein, D.A. (2011). Natural history of hepatocellular adenoma formation in glycogen storage disease type I. *J. Pediatr.* 159, 442–446.
- Iguchi, T., Yamagata, M., Sonoda, T., Yanagita, K., Fukahori, T., Tsujita, E., Aishima, S., Oda, Y., and Maehara, Y. (2016). Malignant transformation of hepatocellular adenoma with bone marrow metaplasia arising in glycogen storage disease type I: a case report. *Mol. Clin. Oncol.* 5, 599–603.
- Cassiman, D., Libbrecht, L., Verslype, C., Meersseman, W., Troisi, R., Zucman-Rossi, J., and Van Vlierberghe, H. (2010). An adult male patient with multiple adenomas and a hepatocellular carcinoma: mild glycogen storage disease type Ia. *J. Hepatol.* 53, 213–217.
- Calderaro, J., Labrune, P., Morcrette, G., Rebouissou, S., Franco, D., Prévot, S., Quaglia, A., Bedossa, P., Libbrecht, L., Terracciano, L., et al. (2013). Molecular characterization of hepatocellular adenomas developed in patients with glycogen storage disease type I. *J. Hepatol.* 58, 350–357.
- Sentner, C.P., Hoogeveen, I.J., Weinstein, D.A., Santer, R., Murphy, E., McKiernan, P.J., Steuerwald, U., Beauchamp, N.J., Taybert, J., Laforêt, P., et al. (2016). Glycogen storage disease type III: diagnosis, genotype, management, clinical course and outcome. *J. Inherit. Metab. Dis.* 39, 697–704.
- Kishnani, P.S., Austin, S.L., Arn, P., Bali, D.S., Boney, A., Case, L.E., Chung, W.K., Desai, D.M., El-Gharbawy, A., Haller, R., et al.; ACMG (2010). Glycogen storage disease type III diagnosis and management guidelines. *Genet. Med.* 12, 446–463.
- Shen, J.J., and Chen, Y.T. (2002). Molecular characterization of glycogen storage disease type III. *Curr. Mol. Med.* 2, 167–175.
- Bernier, A.V., Sentner, C.P., Correia, C.E., Theriaque, D.W., Shuster, J.J., Smit, G.P., and Weinstein, D.A. (2008). Hyperlipidemia in glycogen storage disease type III: effect of age and metabolic control. *J. Inherit. Metab. Dis.* 31, 729–732.
- Liu, K.M., Wu, J.Y., and Chen, Y.T. (2014). Mouse model of glycogen storage disease type III. *Mol. Genet. Metab.* 111, 467–476.
- Pagliarani, S., Lucchiari, S., Ulzi, G., Violano, R., Ripolone, M., Bordoni, A., Nizzardo, M., Gatti, S., Corti, S., Moggio, M., et al. (2014). Glycogen storage disease type III: a novel Agl knockout mouse model. *Biochim. Biophys. Acta* 1842, 2318–2328.
- Haagsma, E.B., Smit, G.P., Niezen-Koning, K.E., Gouw, A.S., Meerman, L., and Slooff, M.J.; The Liver Transplant Group (1997). Type IIIb glycogen storage disease associated with end-stage cirrhosis and hepatocellular carcinoma. *Hepatology* 25, 537–540.
- Siciliano, M., De Candia, E., Ballarin, S., Vecchio, F.M., Servidei, S., Anese, R., Landolfi, R., and Rossi, L. (2000). Hepatocellular carcinoma complicating liver cirrhosis in type IIIa glycogen storage disease. *J. Clin. Gastroenterol.* 31, 80–82.
- Demo, E., Frush, D., Gottfried, M., Koepke, J., Boney, A., Bali, D., Chen, Y.T., and Kishnani, P.S. (2007). Glycogen storage disease type III-hepatocellular carcinoma a long-term complication? *J. Hepatol.* 46, 492–498.
- Mutel, E., Abdul-Wahed, A., Ramamonjisoa, N., Stefanutti, A., Houberton, I., Cavassila, S., Pilleul, F., Beuf, O., Gautier-Stein, A., Penhoat, A., et al. (2011). Targeted deletion of liver glucose-6-phosphatase mimics glycogen storage disease type Ia including development of multiple adenomas. *J. Hepatol.* 54, 529–537.
- Bachrach, B.E., Weinstein, D.A., Orho-Melander, M., Burgess, A., and Wolfsdorf, J.I. (2002). Glycogen synthase deficiency (glycogen storage disease type 0) presenting with hyperglycemia and glucosuria: report of three new mutations. *J. Pediatr.* 140, 781–783.
- Nessa, A., Kumaran, A., Kirk, R., Dalton, A., Ismail, D., and Hussain, K. (2012). Mutational analysis of the GYS2 gene in patients diagnosed with ketotic hypoglycaemia. *J. Pediatr. Endocrinol. Metab.* 25, 963–967.
- Kasapkar, C.S., Aycan, Z., Açoğlu, E., Senel, S., Oguz, M.M., and Ceylaner, S. (2017). The variable clinical phenotype of three patients with hepatic glycogen synthase deficiency. *J. Pediatr. Endocrinol. Metab.* 30, 459–462.
- Koeberl, D.D., Kishnani, P.S., Bali, D., and Chen, Y.T. (2009). Emerging therapies for glycogen storage disease type I. *Trends Endocrinol. Metab.* 20, 252–258.
- Bhattacharya, K. (2015). Investigation and management of the hepatic glycogen storage diseases. *Transl. Pediatr.* 4, 240–248.
- Valayannopoulos, V., Bajolle, F., Arnoux, J.B., Dubois, S., Sannier, N., Baussan, C., Petit, F., Labrune, P., Rabier, D., Ottolenghi, C., et al. (2011). Successful treatment of severe cardiomyopathy in glycogen storage disease type III With D,L-3-hydroxybutyrate, ketogenic and high-protein diet. *Pediatr. Res.* 70, 638–641.
- Yi, H., Brooks, E.D., Thurberg, B.L., Fyfe, J.C., Kishnani, P.S., and Sun, B. (2014). Correction of glycogen storage disease type III with rapamycin in a canine model. *J. Mol. Med. (Berl.)* 92, 641–650.
- Dagli, A.I., and Weinstein, D.A. (2009). Glycogen storage disease type VI. In *GeneReviews*, M.P. Adam, H.H. Ardinger, R.A. Pagon, S.E. Wallace, L.J.H. Bean, K. Stephens, and A. Amemiya, eds. (University of Washington, Seattle), <https://www.ncbi.nlm.nih.gov/books/NBK5941/>.
- Roscher, A., Patel, J., Hewson, S., Nagy, L., Feigenbaum, A., Kronick, J., Raiman, J., Schulze, A., Siriwardena, K., and Mercimek-Mahmutoglu, S. (2014). The

- natural history of glycogen storage disease types VI and IX: Long-term outcome from the largest metabolic center in Canada. *Mol. Genet. Metab.* 113, 171–176.
38. Austin, S.L., Proia, A.D., Spencer-Manzon, M.J., Butany, J., Wechsler, S.B., and Kishnani, P.S. (2012). Cardiac pathology in glycogen storage disease type III. *JIMD Rep.* 6, 65–72.
  39. Mogahed, E.A., Girgis, M.Y., Sobhy, R., Elhabashy, H., Abdelaziz, O.M., and El-Karaksy, H. (2015). Skeletal and cardiac muscle involvement in children with glycogen storage disease type III. *Eur. J. Pediatr.* 174, 1545–1548.
  40. Khan, T., Weber, H., DiMuzio, J., Matter, A., Dogdas, B., Shah, T., Thankappan, A., Disa, J., Jadhav, V., Lubbers, L., et al. (2016). Silencing myostatin using cholesterol-conjugated siRNAs induces muscle growth. *Mol. Ther. Nucleic Acids* 5, e342.
  41. Chen, Y.T. (1991). Type I glycogen storage disease: kidney involvement, pathogenesis and its treatment. *Pediatr. Nephrol.* 5, 71–76.
  42. Liu, D., Li, C., Chen, Y., Burnett, C., Liu, X.Y., Downs, S., Collins, R.D., and Hawiger, J. (2004). Nuclear import of proinflammatory transcription factors is required for massive liver apoptosis induced by bacterial lipopolysaccharide. *J. Biol. Chem.* 279, 48434–48442.

## **Supplemental Information**

### **Inhibition of Glycogen Synthase II with RNAi**

#### **Prevents Liver Injury in Mouse Models**

#### **of Glycogen Storage Diseases**

**Natalie Pursell, Jessica Gierut, Wei Zhou, Michael Dills, Rohan Diwanji, Monika Gjorgjieva, Utsav Saxena, Jr-Shiuan Yang, Anee Shah, Nandini Venkat, Rachel Storr, Boyoung Kim, Weimin Wang, Marc Abrams, Margaux Raffin, Gilles Mithieux, Fabienne Rajas, Henryk Dudek, Bob D. Brown, and Chengjung Lai**



**Supplementary Fig. S1.** Glycogenesis and Glycogenolysis Pathways.

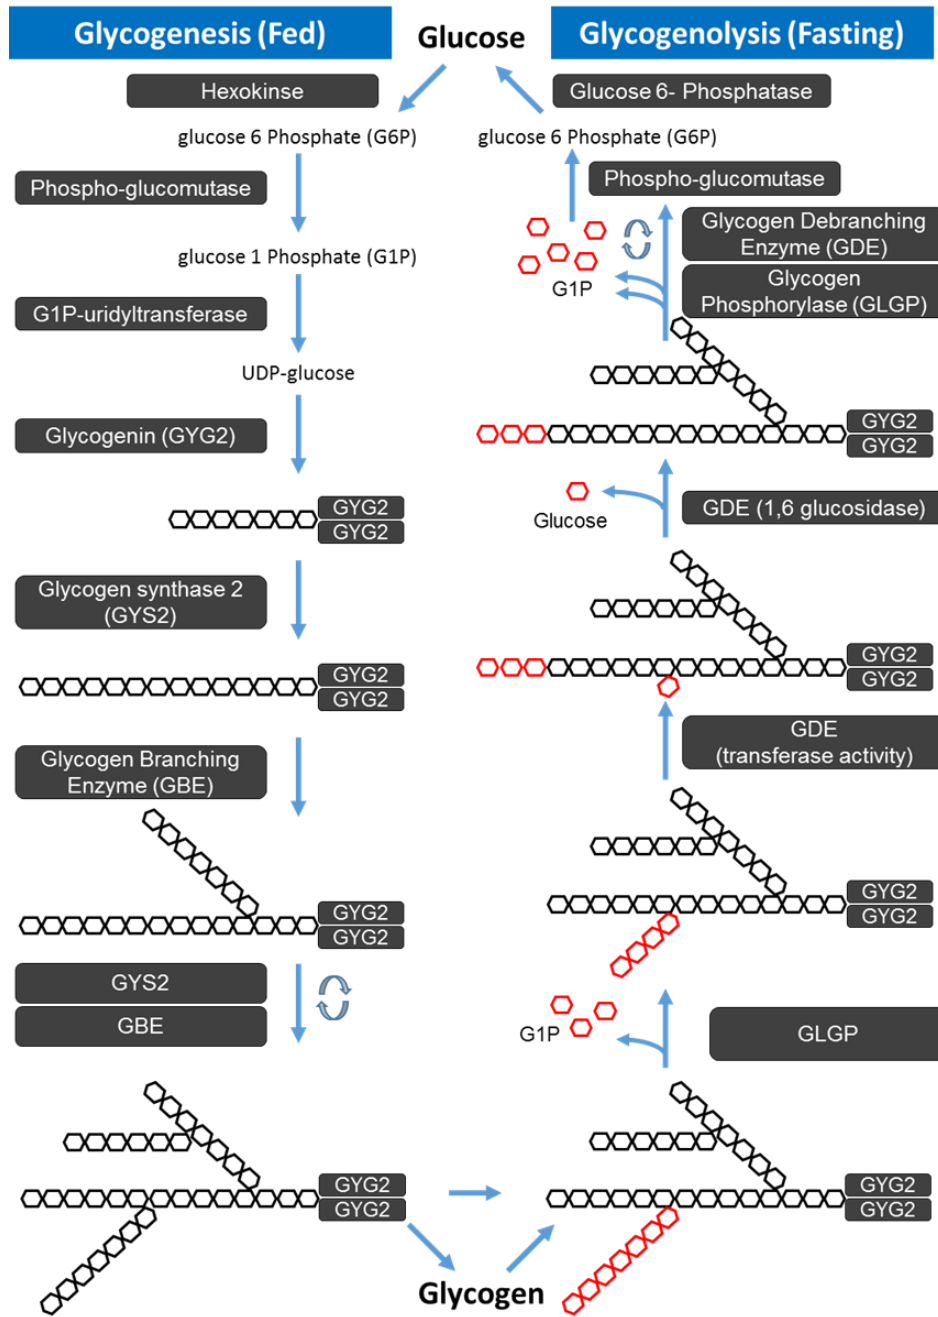

Supplementary Fig. S2. Identification of lead *Gys2* siRNAs.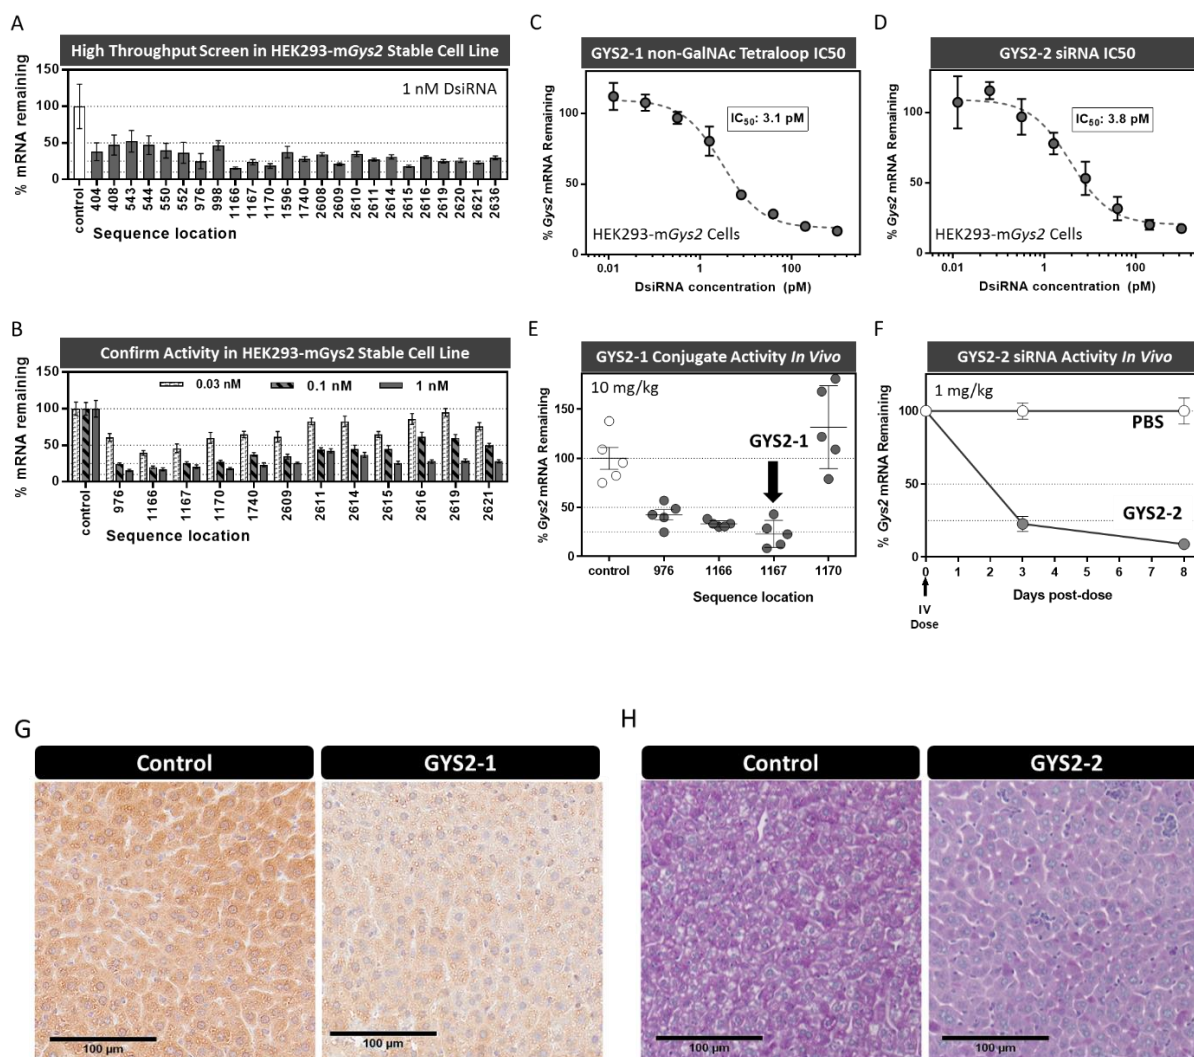

(A) Results from high-throughput screen of *Gys2* siRNA sequences in HEK293 cells stably expressing mouse *Gys2* mRNA (HEK293-mGys2) identifies potent sequences. (B) Activity of best siRNA sequences was confirmed in HEK293-mGys2 with a three-point dose-response. (C) *Gys2*-1167 sequences was converted into a tetraloop conjugate (no GalNAc sugar residues) and its IC<sub>50</sub> determined in HEK293-mGys2 cells. (D) *Gys2*-1166 was selected as GYS2-2 and its IC<sub>50</sub> measured in HEK293-mGys2 cells. (E) GalNAc sugar residues were added to GYS2-1 and other *Gys2* siRNA sequences for confirmation of potency *in vivo*. Wild-type mice were given a single, subcutaneous 10 mg/kg dose and sacrificed three days later. RNA was prepared from terminal liver samples and *Gys2* mRNA inhibition measured by RT-PCR. GYS2-1 shows approximately 75% reduction in *Gys2* mRNA. (F) GYS2-2 siRNA was formulated in lipid nanoparticle and intravenously injected into mice at 1 mg/kg. Mice were sacrificed three or eight days post-dose for RNA preparation and *Gys2* mRNA measurement by RT-PCR. (G) The results of immunohistochemistry indicate GYS2-1 reduces GYS protein expression in nearly all hepatocytes. (H) The results of PAS staining indicate GYS2-2 reduces glycogen accumulation in nearly all hepatocytes. Scale bar represents 100  $\mu$ m.

**Supplementary Fig. S3. *Gys2* mRNA Knockdown Prevents Abnormal Glycogen Accumulation and Hepatic Abnormalities in the *Ag1<sup>-/-</sup>* GSD III mouse model.**

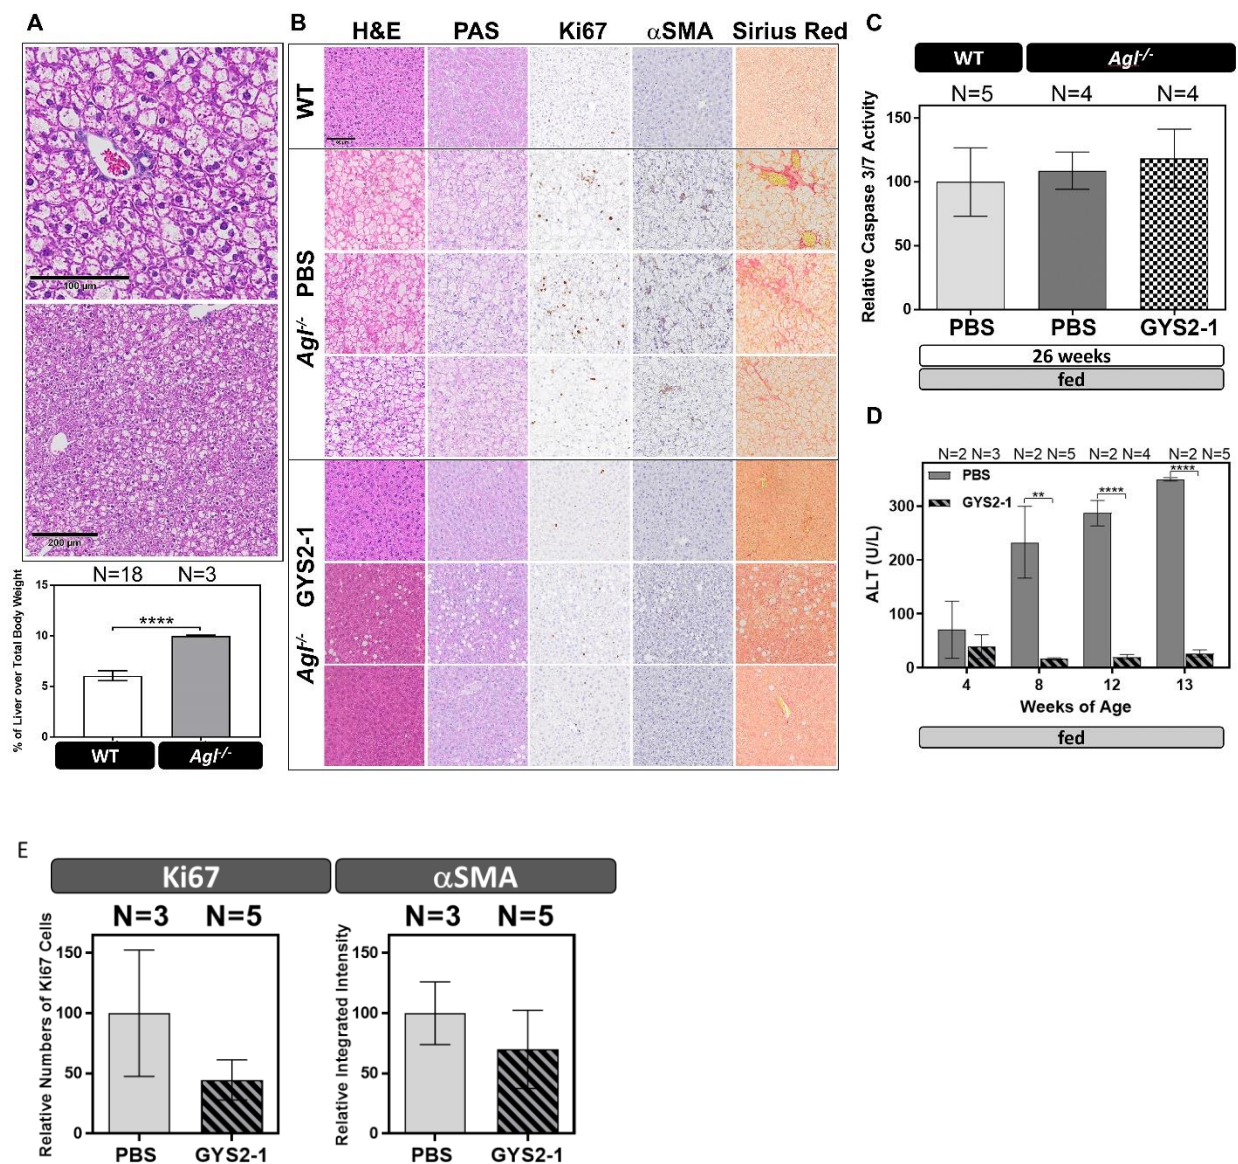

(A) *Ag1<sup>-/-</sup>* mice develop hepatomegaly with abnormal histomorphology by four weeks of age. The liver-to-body weight ratio in *Ag1<sup>-/-</sup>* mice is significantly increased compared to wildtype mice ( $p < 0.0001$ ). Scale bar represents 100  $\mu$ m (upper panel) and 200  $\mu$ m (lower panel). (B) *Ag1<sup>-/-</sup>* mice treated with PBS or GYS2-1 for 10 doses starting at 4 weeks of age. Histological analysis indicates that GYS2-1 is able to prevent the development of abnormal histopathology of *Ag1<sup>-/-</sup>* mice. In GYS2-1 treated animals, H&E or PAS stained liver sections showed a reduction of vacuoles formed from over-accumulation of glycogen molecules. Increased Ki67 positive cells were observed in *Ag1<sup>-/-</sup>* mice and were reduced with GYS2-1 treatment. Sirius red staining and IHC for  $\alpha$ SMA also indicate that GYS2-1 effectively reduces fibrosis of *Ag1<sup>-/-</sup>* mice. Representative images of three individual animals from PBS or GYS2-2 treated groups are shown. Scale bar represents 100  $\mu$ m. (C) Measurement of Caspase-3/7 activity in mouse liver extracts does not show an elevation of the activity of apoptotic Caspases 3 and 7. (D) *Ag1<sup>-/-</sup>* mice show increasing signs of liver damage with



increasing age measured by quantification of blood ALT levels which is prevented by GYS2-1 treatment (\*\*  $p \leq 0.01$ , \*\*\*  $p < 0.0001$ ). (E) Quantitative analysis of IHC of Ki67 and  $\alpha$ -SMA staining shown in (B).

Supplementary Fig. S4. Quantitative analysis of Ki67 staining in PBS or GYS2-1 treated GSD III, *Agl*<sup>-/-</sup> mice.

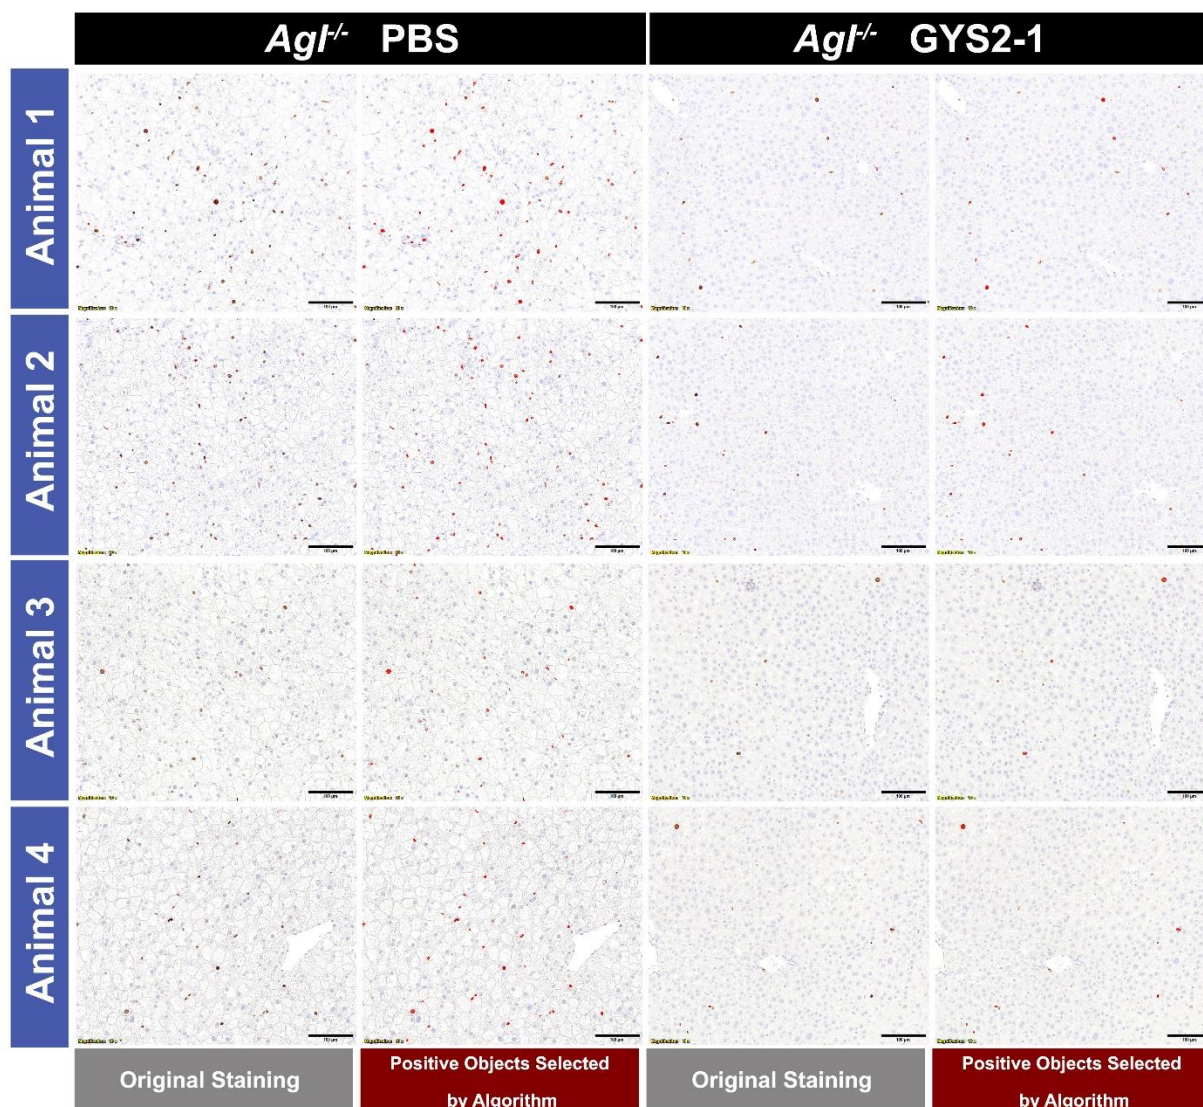

Quantitative analysis of Ki67 staining in the liver of *Agl*<sup>-/-</sup> mice treated with PBS or GYS2-1 weekly for 18 doses starting at 8 weeks of age was performed using Olympus cellSens software. Briefly, five ROIs (approximately 320,000  $\mu\text{m}^2$  each) of one representative liver section for each individual animal were scored and quantified using an algorithm with a pre-defined intensity threshold. Examples of positive object selection using the algorithm are shown. The total number of positive counts normalized to the total area quantified was compared for PBS or GYS2-1 treated animals and the results summarized in Fig. 3C. Scale bar represents 100  $\mu\text{m}$ .



Supplementary Fig. S5. Quantitative analysis of  $\alpha$ SMA staining in PBS or GYS2-1 treated GSD III,  $Agf^{-/-}$  mice.

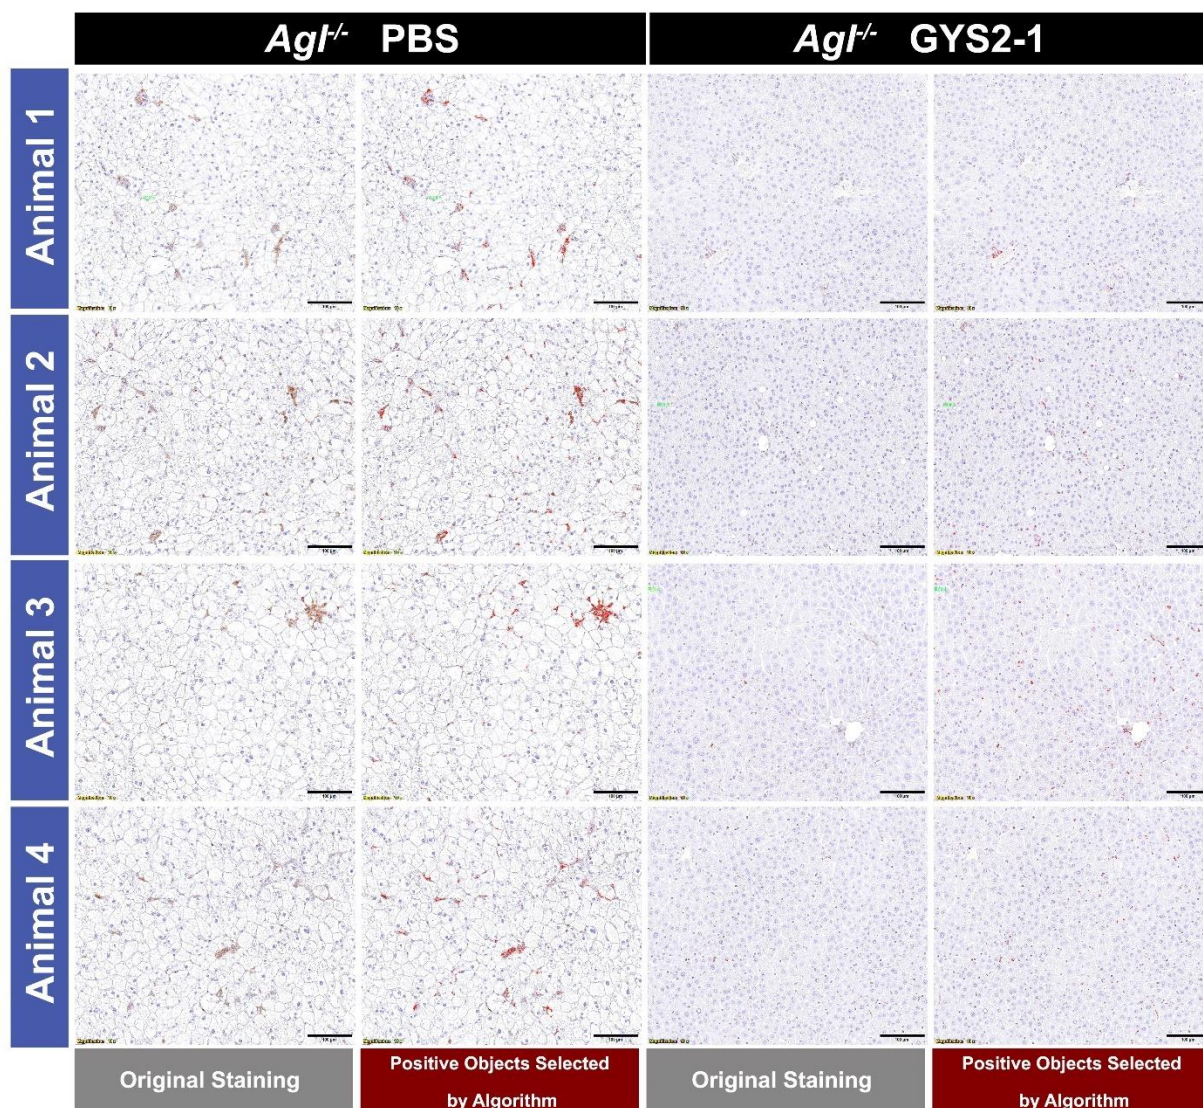

Quantitative analysis of  $\alpha$ SMA staining in the liver of  $Agf^{-/-}$  mice treated with PBS or GYS2-1 weekly for 18 doses starting at 8 weeks of age was performed using Olympus cellSens software. Briefly, five ROIs (approximately  $320,000 \mu\text{m}^2$  each) of one representative liver section for each individual animal were scored and quantified using an algorithm with a pre-defined intensity threshold. Certain areas were intentionally excluded from quantification in order to minimize the signal contributing from smooth muscles of large blood vessels. Examples of positive object selection using the algorithm are shown. The sum intensity normalized to the total area quantified was compared for PBS or GYS2-1 treated animals and the results summarized in Fig. 3C. Scale bar represents  $100 \mu\text{m}$ .



Supplementary Fig. S6. Quantitative analysis of Sirius Red staining in PBS or GYS2-1 treated GSD III, *Agl*<sup>-/-</sup> mice.

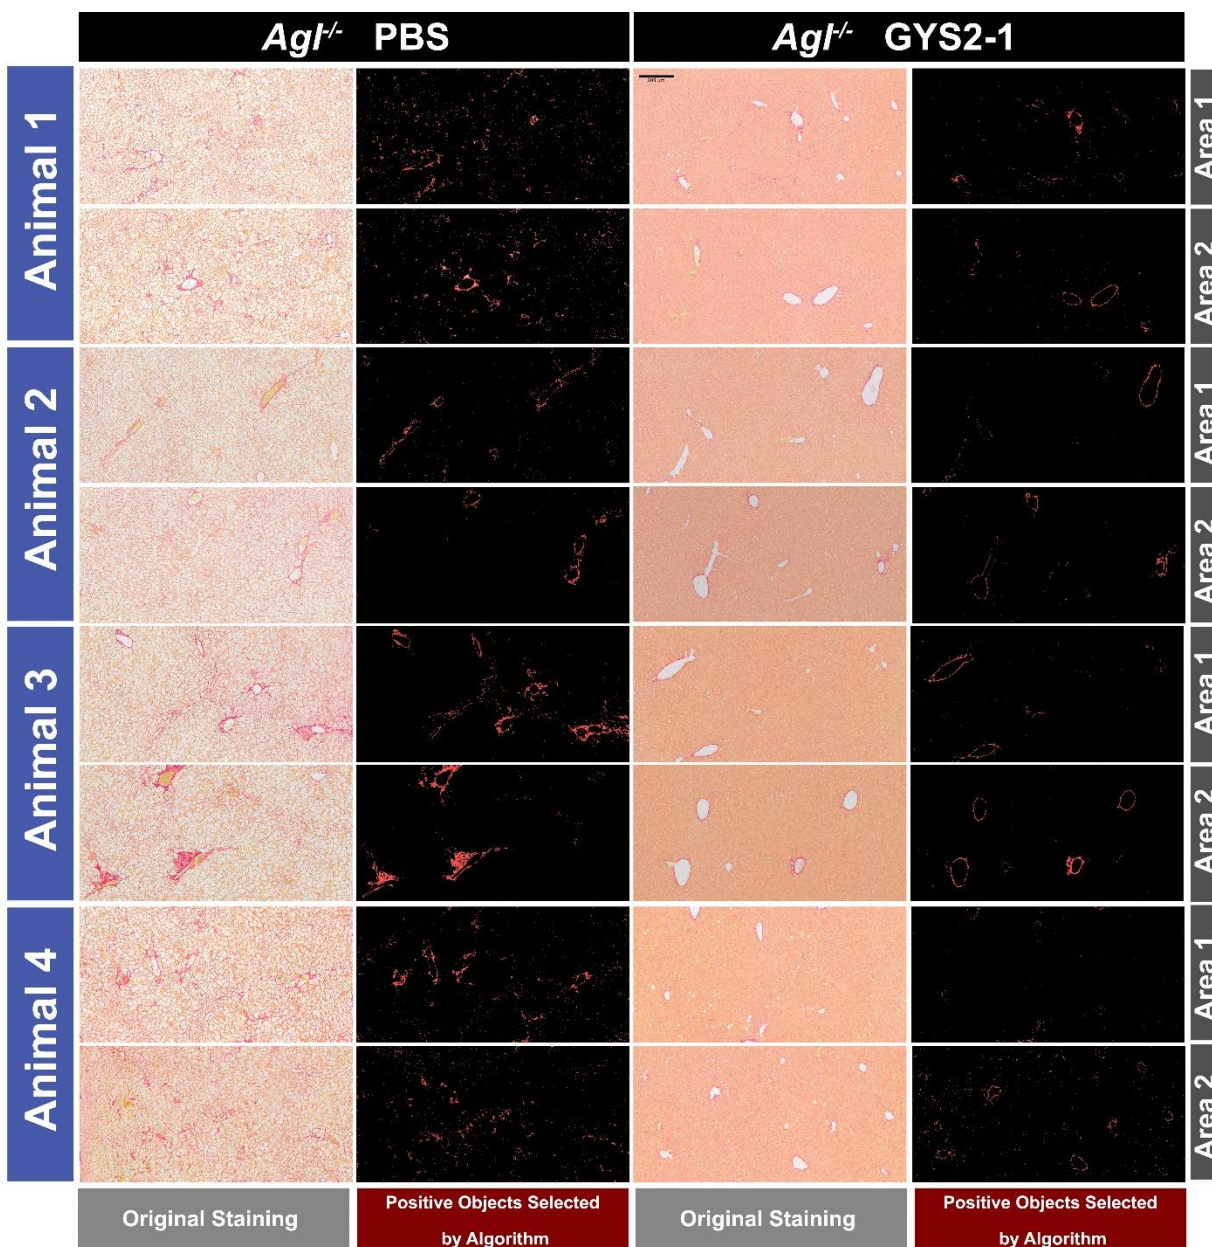

Quantitative analysis of Sirius Red staining in the liver of *Agl*<sup>-/-</sup> mice treated with PBS or GYS2-1 weekly for 18 doses starting at 8 weeks of age was performed using Olympus cellSens software. Briefly, two representative areas (approximately 2,000,000  $\mu\text{m}^2$  each) of one representative liver section for each individual animal were scored and quantified using an algorithm with a pre-defined intensity threshold. Certain areas were intentionally excluded from quantification in order to minimize the signal contributing from smooth muscles of large blood vessels. Examples of positive object selection using the algorithm are shown. The sum intensity normalized to the total area quantified was compared for PBS or GYS2-1 treated animals and the results summarized in Fig. 3C. Scale bar represents 200  $\mu\text{m}$ .

Supplementary Fig. S7. GYS2-1 treatment prevents hepatomegaly in GSD III, *Ag1<sup>-/-</sup>* mice.

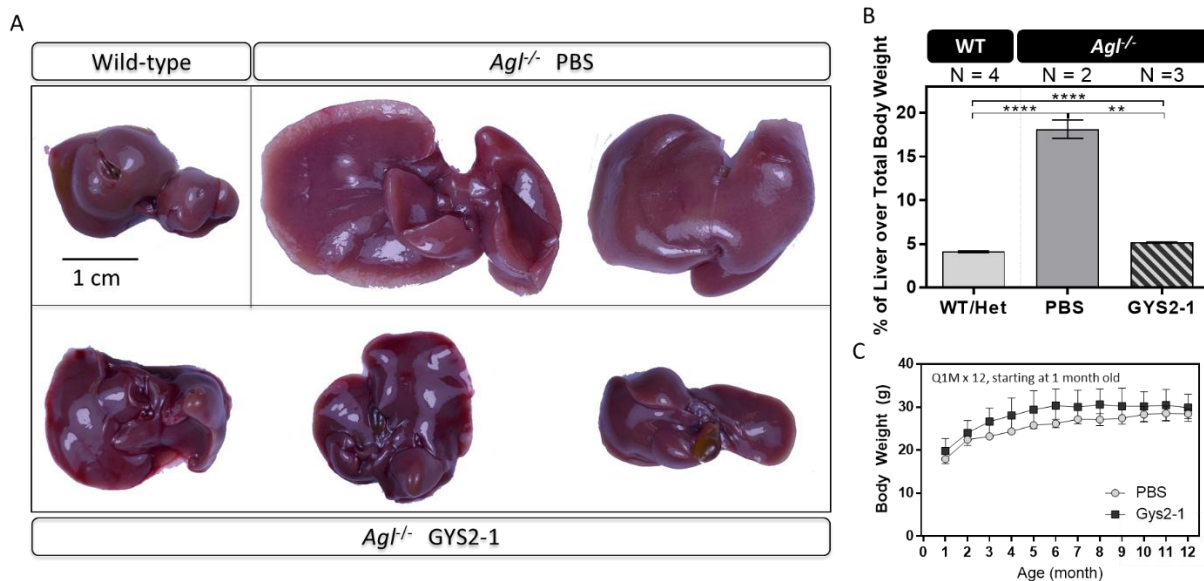

*Ag1<sup>-/-</sup>* mice were treated with PBS or GYS2-1 monthly for 12 doses starting at 1 month of age. Liver samples were collected 72 hours following the final dose. (A and B) Inhibition of GYS2 synthesis with GYS2-1 treatment effectively prevents hepatomegaly in *Ag1<sup>-/-</sup>* mice. Scale bar represents 1 cm. (\*\*  $p \leq 0.01$ , \*\*\*\*  $p < 0.0001$ ). (C) GYS2-1 treatment has no effects on growth rate of *Ag1<sup>-/-</sup>* mice. Scale bar represents 1 cm.



Supplementary Fig. S8. Quantitative analysis of Sirius Red staining in PBS or GYS2-1 treated GSD III, *Agf*<sup>-/-</sup> mice in a long-term study.

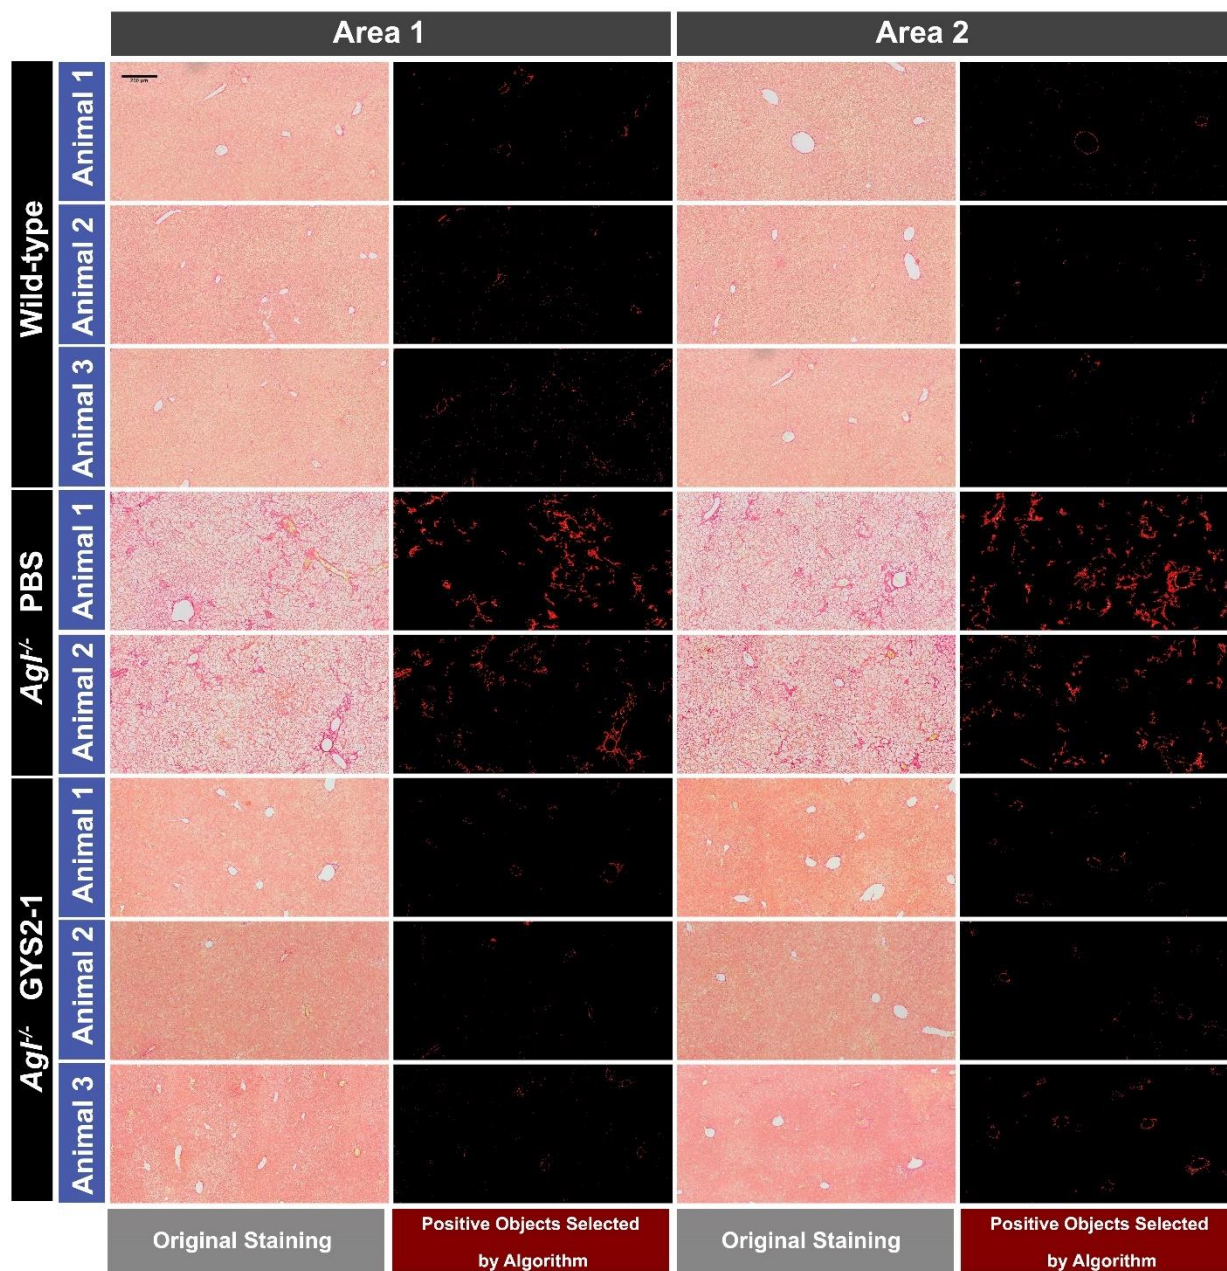

Quantitative analysis of Sirius Red staining in the liver of *Agf*<sup>-/-</sup> mice treated with PBS or GYS2-1 monthly for 12 doses starting at 1 month of age was performed using Olympus cellSens software. Briefly, two representative areas (approximately 2,000,000  $\mu\text{m}^2$  each) of one representative liver section for each individual animal were scored and quantified using an algorithm with a pre-defined intensity threshold. Certain areas were intentionally excluded from quantification in order to minimize the signal contributing from smooth muscles of large blood vessels. Examples of positive object selection using the algorithm are shown. The sum intensity normalized to the total area quantified



was compared for PBS or GYS2-1 treated animals and the results summarized in Fig. 6C. Scale bar represents 200  $\mu\text{m}$ .

**Supplementary Fig. S9. Histopathology analysis of growing nodule in *Agl*<sup>-/-</sup> mice.**

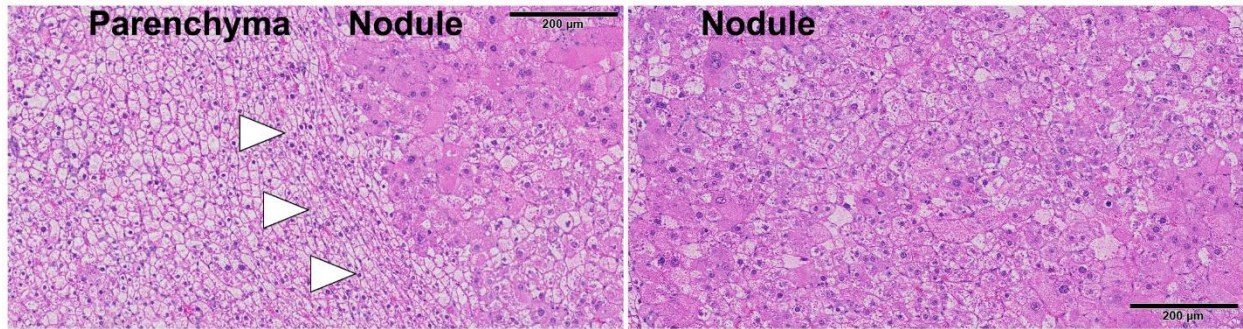

*Agl*<sup>-/-</sup> mice were treated with PBS or GYS2-1 monthly for 12 doses starting at 1 month of age. Liver samples were collected 72 hours following the final dose for H&E staining. Junction of parenchyma and nodule were indicated (arrowheads). Scale bar represents 200 µm.

**Supplementary Fig. S10. No nuclear  $\beta$ -catenin staining was noted of growing nodules in  $Agl^{-/-}$  mice.**

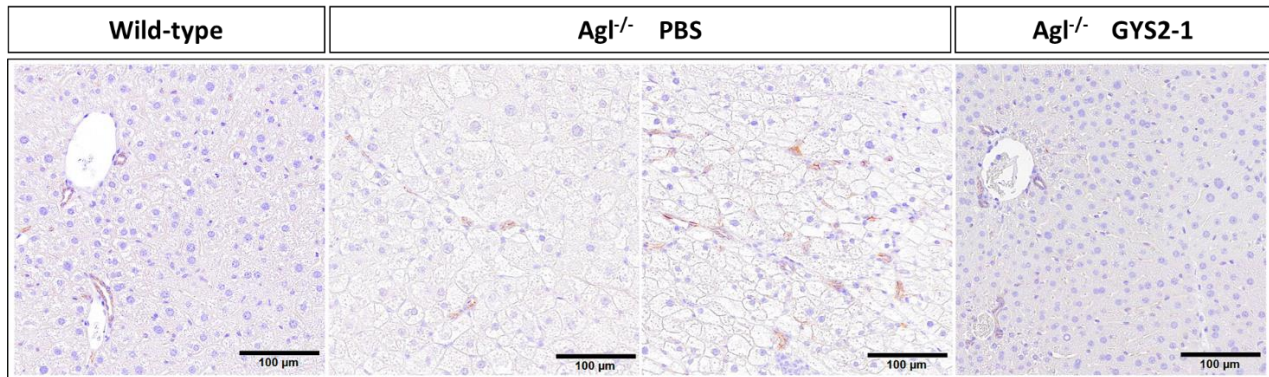

$Agl^{-/-}$  mice were treated with PBS or GYS2-1 monthly for 12 doses starting at 1 month of age. Liver samples were collected 72 hours following the final dose for  $\beta$ -catenin IHC. No nuclear  $\beta$ -catenin staining was noted in the nodules of PBS-treated  $Agl^{-/-}$  mice. Scale bar represents 100  $\mu$ m.



**Supplementary Fig. S11. Correction of liver pathology thoroughly with GYS2-1 treatment in *Agl*<sup>-/-</sup> mice**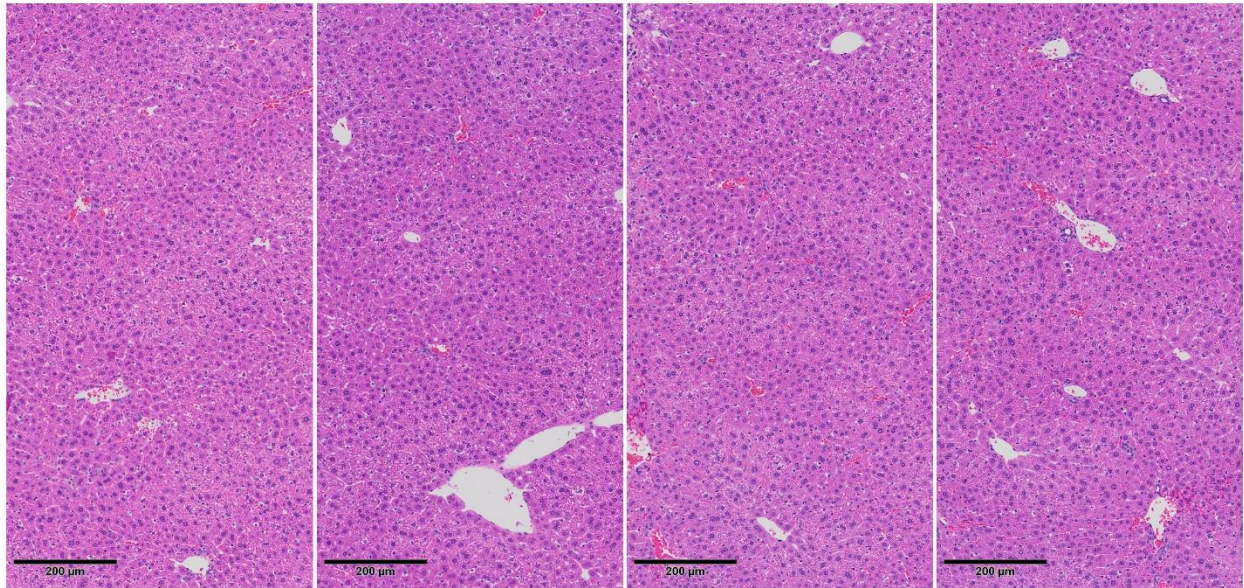

*Agl*<sup>-/-</sup> mice were treated with GYS2-1 monthly for 12 doses starting at 1 month of age. Liver samples were collected 72 hours following the final dose for histological analysis. H&E stained sections from four levels throughout the collected tissue sample are shown. The results demonstrate that GYS2-1 treatment fully reverses the liver pathology throughout the entire liver of *Agl*<sup>-/-</sup> mice until they are indistinguishable from their wildtype littermates. Scale bar represents 200 μm.

Supplementary Fig. S12. *L-G6pc*<sup>-/-</sup> mice have almost undetectable *G6pc* mRNA in the liver.

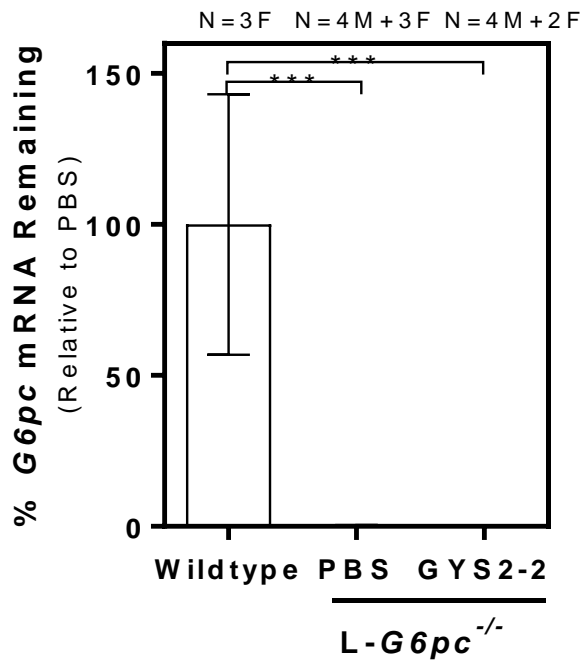

To generate *L-G6pc*<sup>-/-</sup> mice, G6Pase activity was disrupted specifically in the liver by temporal and tissue-specific deletion of the *G6pc* gene using CRE-lox strategy. In brief, conditional B6.*G6pc*<sup>lox/lox</sup> mice were crossed with transgenic B6.SA<sup>creERT2/w</sup> mice to generate B6.*G6pc*<sup>lox/lox</sup>.SA<sup>creERT2/w</sup> mice, expressing inducible CREERT2 specifically in the liver. The treatment of adult B6.*G6pc*<sup>lox/lox</sup>.SA<sup>creERT2/w</sup> mice with tamoxifen induced the excision of *G6pc* exon 3, specifically in the liver, leading to an undetectable hepatic *G6pc* mRNA detected by RT-PCR analysis of liver samples taken at the time of euthanasia after 5 doses of GYS2-2.

**Supplementary Fig. S13. RNAi-mediated reduction of *Gys2* has no effect on glycemia, metabolism, lipidemia, or body weight in mouse models of GSD Ia and GSD III.**

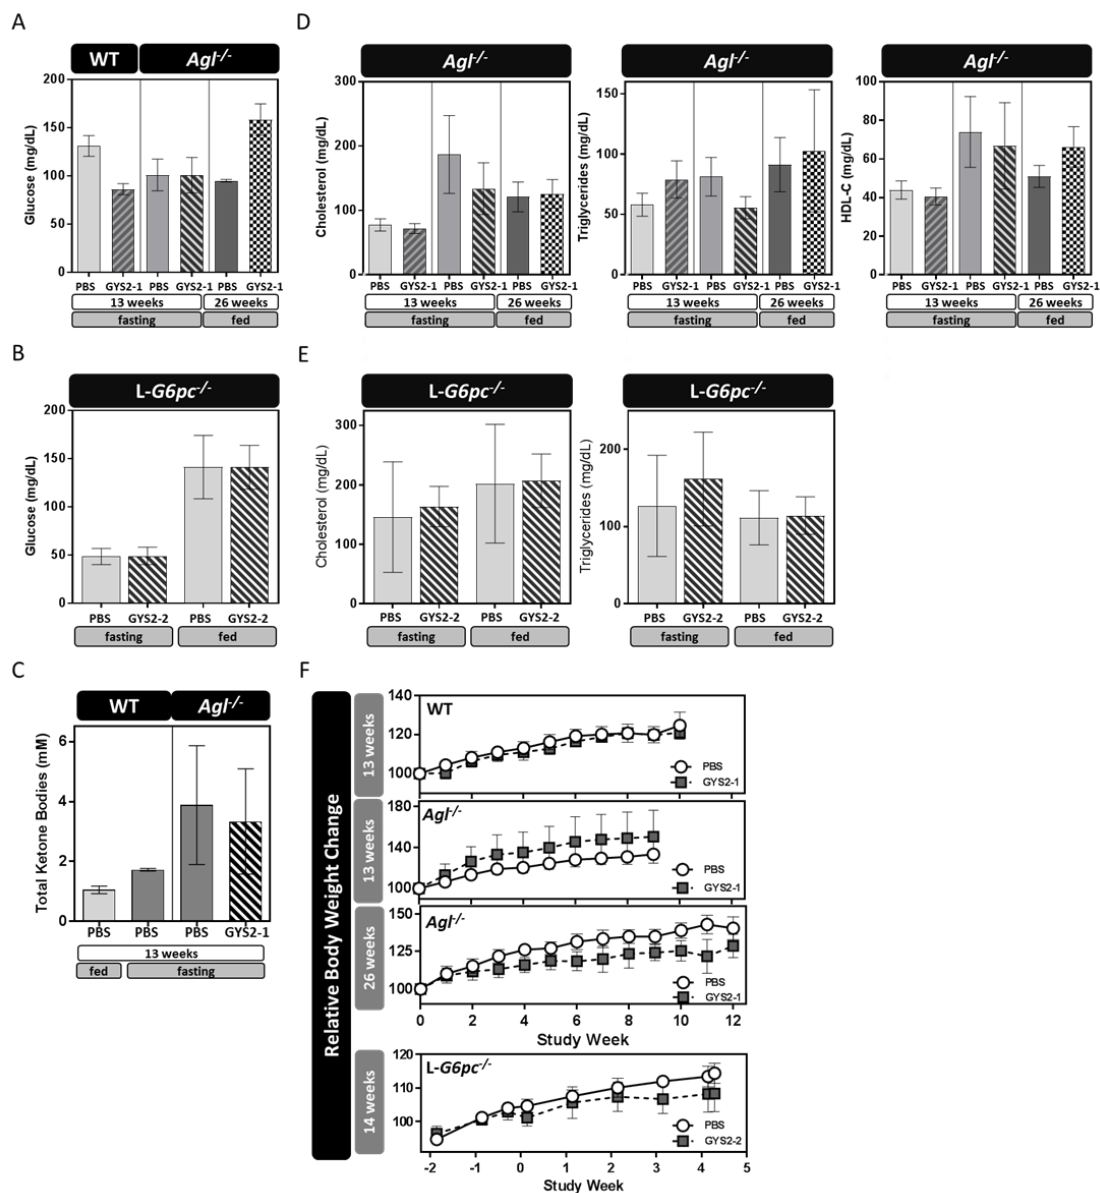

Liver-specific *Gys2* inhibition does not affect in glycemia in mouse models of (A) GSD III or (B) GSD Ia. (C) Increased levels of ketone bodies were measured in blood of *Agf<sup>-/-</sup>* mice during fasting indicating an increase in gluconeogenesis in the GSD III mouse model. GYS2-1 treatment had no effect on ketone body levels suggesting *Gys2* inhibition will not affect gluconeogenesis. Reduction of *Gys2* mRNA expression in the liver had no effects on lipidemia in GSD III (D) or GSD Ia (E) mice. (F) GYS2-1 and GYS2-2 treatment did not affect body weight of GSD III or GSD Ia mice, respectively.



**Supplementary Fig. S14. GYS2-1 treatment does not reduce glycogen accumulation in skeletal muscle measured by PAS staining of formalin-fixed muscle tissue.**

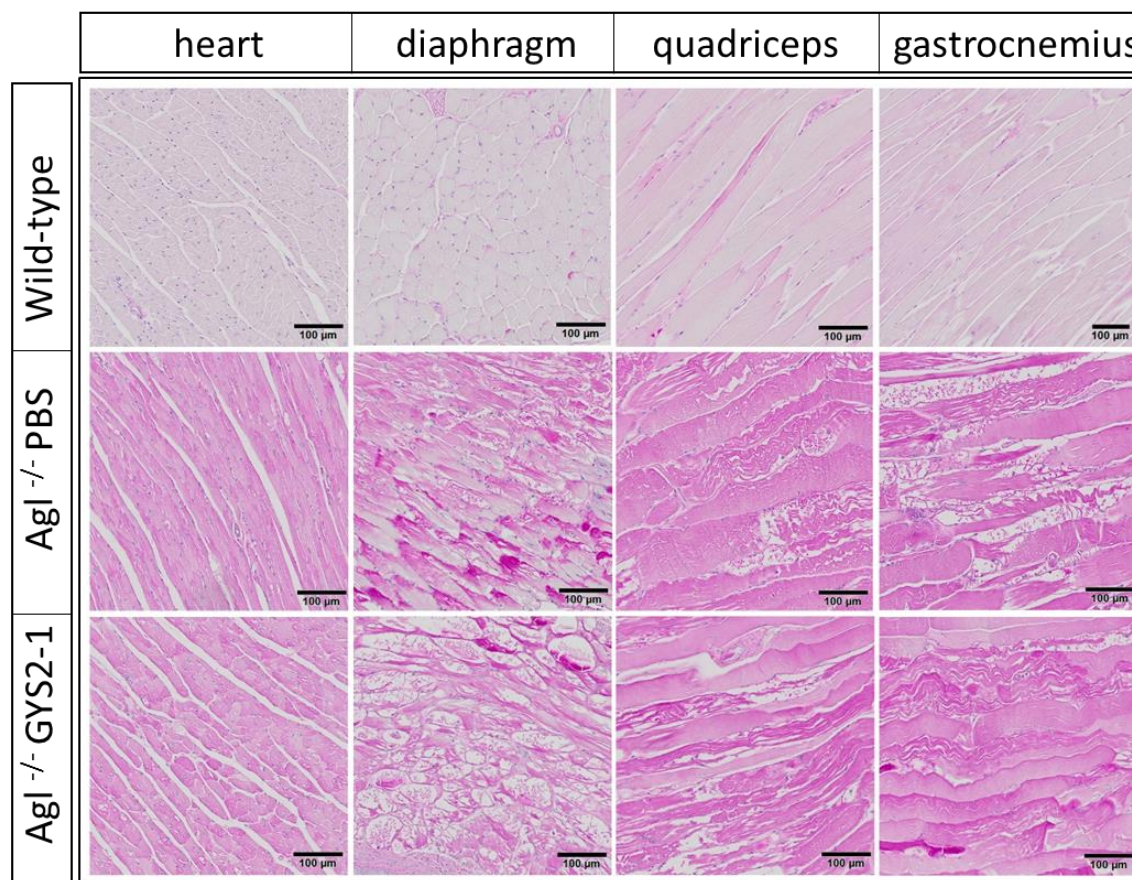

GalNAc-mediated delivery of siRNA conjugates mediated through the ASGPR receptor is liver-specific and GYS2-1 treatment has no effect on cardiac or skeletal muscle. Scale bar represents 100  $\mu$ m.
